1 **Title:** Structural characterization of the PCV2d genotype at 3.3 Å resolution reveals differences to  
2 PCV2a and PCV2b genotypes, a tetranucleotide, and an N-terminus near the icosahedral 3-fold axes  
3 Reza Khayat<sup>a,b,#</sup>, Ke Wen<sup>c</sup>, Aleksandra Alimova<sup>d</sup>, Boris Gavrillov<sup>e</sup>, Al Katz<sup>f</sup>, Jose M. Galarza<sup>c</sup>, J. Paul  
4 Gottlieb<sup>d</sup>

5 Running Head: Porcine circovirus 2 vaccine development

6  
7 a. Department of Chemistry and Biochemistry, The City College of New York, New York, NY 10031

8 b. Graduate Program in Biochemistry, The Graduate Center of the City University of New York, New  
9 York, NY 10016

10 c. TechnoVax, Inc., 6 Westchester Plaza, Elmsford NY 10523 USA

11 d. CUNY School of Medicine, City College of New York, NY 10031, USA

12 e. Biologics Development, Huvepharma, 3A Nikolay Haytov Street, Sofia 1113, Bulgaria

13 f. Department of Physics, City College of New York, New York, NY 10031, USA

14  
15 # Address correspondence to Reza Khayat, [rkhayat@ccny.cuny.edu](mailto:rkhayat@ccny.cuny.edu)

16

## 17 **Abstract**

18 Porcine circovirus 2 (**PCV2**) is a T=1 non-enveloped icosahedral virus that has a major impact on the  
19 swine industry as an agent of porcine circovirus associate disease. PCV2 capsid protein sequences  
20 have been employed by others to provide a temporal description of the emerging genotypes. PCV2a  
21 is believed to be the earliest genotype and responsible for giving rise to PCV2b, which gives rise to  
22 PCV2d. The underlying mechanism responsible for the emerging genotypes is not understood. To  
23 determine if a change in the PCV2d capsid accompanies the emergence of this genotype, we  
24 determined the cryo-electron microscopy image reconstruction of PCV2d VLP at 3.3 Å resolution and  
25 compared it to the previously reported PCV2a and PCV2b structures. Differences between the CD  
26 and GH loops identify structural changes that accompany the emergence of PCV2b from PCV2a, and  
27 PCV2d from PCV2b. We also model additional amino acids for the N-terminus near the icosahedral  
28 3-fold axes of symmetry and a tetranucleotide between the 5- and 2-fold axes of symmetry. To  
29 interpret the sequence diversity that defines the PCV2 genotypes on a structural platform we have  
30 performed structure-based sequence comparison. Our analysis demonstrates that each genotype  
31 possesses a unique set of amino acids located on the surface of the capsid that experience a high  
32 degree of substitution. These substitutions may be a response to the PCV2 vaccination program. The  
33 structural difference between PCV2a, b and d genotypes indicate that it is important to determine the  
34 PCV2 capsid structure as the virus evolves into different genotypes.

## 36 **Importance**

37 PCV2 is a significant epidemic agricultural pathogen that is the causative agent of a variety of swine  
38 illnesses. PCV2 infections have significant economic impact in the swine industry and must be  
39 controlled by vaccination. Outbreaks in farms vaccinated for PCV2 suggest that improvements to the  
40 current vaccination programs are needed. Better understanding of the assembly, structure, replication  
41 and evolution of these viruses is necessary for production of improved vaccines. The ability of PCV2  
42 to rapidly shift genotypes suggests that expression systems capable of rapidly producing large  
43 quantities of virus-like particles should be pursued. To these ends we have established a mammalian  
44 cell-based virus-like particle expression system and performed high resolution structural studies of a  
45 new PCV2 genotype. Differences between the structure of this genotype and earlier genotypes  
46 demonstrate that it is important to study the PCV2 structure as it shifts genotypes.

## 48 **Key Words:**

49 Circovirus, virus-like particle (VLP), cryo-electron microscopy, virus evolution, capsid structure,  
50 vaccine development

## 52 Introduction

53       Circoviruses are small nonenveloped icosahedral viruses that contain a circular, covalently  
54 closed, single stranded DNA (**ssDNA**) genome. Circoviruses have been identified in a variety of  
55 species and are known to cause infections in avian, aquatic, and terrestrial animals (1, 2). The  
56 variation of the capsid morphology and genome organization has recently led to the classification of  
57 the *Circoviridae* family into two separate genera, *Cyclovirus* and *Circovirus* (3). Genome sequences  
58 associated with the *Cyclovirus* genus has been identified from several vertebrate and invertebrate  
59 species, although the recognition of definitive host for this group is still unclear (2). The genus  
60 *circovirus* comprises porcine circoviruses types 1 (**PCV1**), 2 (**PCV2**), and 3 (**PCV3**) (2). PCV2  
61 infections are responsible for significant mortality among swine as the causative agent of porcine  
62 circovirus associated disease (**PCVAD**) -weight loss, jaundice, stressed appearance,  
63 enlarged/depleted lymph nodes, pneumonia, enteritis, diarrhea, increased mortality and cull rates,  
64 abortions, stillbirths, and mummies (1, 4).

65       The PCV2 particle is approximately 19 nm in diameter, and the genome of PCV ranges from 1.7  
66 kb to 2.3 kb in size. The circular nature of the genome has led to the viral family name *circovirus*. The  
67 evolutionary history has been explored and has allowed detailed phylogenetic trees and variations in  
68 the capsid surface structure to be described (5-8). The initial cryo-EM image reconstruction of several  
69 native circoviruses demonstrated that the capsid has  $T=1$  icosahedral symmetry (9). The PCV  
70 genome encodes for one structural capsid protein (**CP**). Expression and purification of the PCV2b CP  
71 protein from *E. coli* were demonstrated to self-assemble and mimic the overall morphology of the  
72 infectious virus. The crystal structure of the *E. coli* produced virus-like particle (**VLP**) visualized the  
73 CP fold to be that of the canonical viral jelly roll consisting of two four stranded  $\beta$ -sheets (10, 11). The  
74 loops connecting the  $\beta$ -strands form the features on the viral surface and may include the antigenic  
75 epitopes. The PCV2b CP was also expressed and purified as VLP from *Trichoplasia ni* insect cells  
76 (11). The cryo-EM image reconstruction of this VLP demonstrated that the N-terminus is located



77 inside the capsid, and the authors concluded that the antigenic properties associated with the N-  
78 terminus is likely a result of the N-terminus transiently externalizing from the capsid via a process  
79 referred to as viral “breathing” (11-13). The externalization of the N-terminus may play an important  
80 role in the life cycle of the virus. While production of CP from *E. coli* and baculovirus expression  
81 systems have resulted in assembly of PCV2 VLPs that appear to resemble the structures of native  
82 PCV2 virus, the systems are quite different from a mammalian system which is a natural host for  
83 PCV2 virus. A mammalian expression system may provide better conditions for the examination of  
84 capsid assembly and structure; therefore, we have chosen HEK293 mammalian cells to evaluate the  
85 formation and structural characterization of the produced PCV2 VLPs.

86 The PCV2 CP entries in GenBank were recently categorized into eight different genotypes  
87 (PCV2a-h) (14). The chronological deposition of PCV2 sequences into GenBank suggests that  
88 PCV2a was the dominant global genotype until early-2000 when a genotype shift to PCV2b was  
89 observed (15, 16). The PCV2c genotype has only been reported from European countries and may  
90 have become extinct as there are only four depositions in GenBank. In 2013 Wei *et al.* reported and  
91 deposited a large quantity of PCV2d sequences into GenBank (5). Since then the number of PCV2d  
92 depositions in GenBank has significantly outpaced the deposition of PCV2b sequences (7, 14). The  
93 increase in the deposition of PCV2d sequences may be a result of PCV2d becoming an emerging  
94 and predominant genotype in Asia, Europe, North and South America. While the cause(s) for the  
95 increase in depositions remains unclear, the presence of PCV2d in vaccinated herds suggests that  
96 either the vaccine is not appropriately administered or that PCV2d represents a genotype resistant to  
97 vaccination (17, 18). Despite the significant number of phylogenetic studies of the PCV2 genotypes  
98 and the emerging importance of PCV2d on the global swine industry there are no reports describing  
99 the structure of the PCV2d capsid. To determine if a structural difference between PCV2b and PCV2d  
100 may explain the shift in genotypes, we established an expression system for producing large  
101 quantities of the PVC2d VLPs in mammalian cells (human embryonic kidney: HEK 293). Study of the

cytoplasmic and nuclear fractions of the mammalian cells indicates that PCV2 assembles and remains in the nucleus within 72 hours of transfection. The cryo-EM image reconstruction of the VLPs determined to a resolution of 3.3 Å allows us to confidently model the atomic coordinates for amino acids 36-231. Comparison of the PCV2d atomic coordinates to that of PCV2a and PCV2b identifies loops CD and GH of PCV2b/d to significantly deviate from the PCV2a structure. These differences provide a structural explanation for the PCV2a to PCV2b shift in genotypes. Comparison of the coordinates for amino acids 36-45 to a recently reported PCV2 cryo-EM image reconstruction indicates a significant difference between the two models. We model the N-terminus to be near the icosahedral 3-fold axes of symmetry while Mo *et al.* model the N-terminus to be near the icosahedral 5-fold axes of symmetry (19). We discuss this discrepancy in the discussion section. We use the PCV2d cryo-EM image reconstruction to calculate ~1,200 nucleotides to be packaged into the VLP, and support this finding with absorption spectroscopy measurements. We further model a Pu-Pu-Py-Py tetranucleotide between the icosahedral 5- and 2-fold axes of symmetry. The strong density for the tetranucleotide suggests that the PCV2d capsid selects this nucleotide sequence from the pool of sequences present in the nucleus where capsid assembly occurs. We then compare the surface amino acids composition of PCV2a, b, d and determine that the amino acids that experience sequence diversity (identity) and variability (entropy) within each genotype are unique to that genotype. The PCV2a genotype experiences the greatest sequence diversity and the lowest sequence variability, whereas the PCV2b and d genotypes experience lower sequence diversity and greater variability. Expanding this analysis to include the remaining genotypes (1,278 unique entries) indicates that except for three amino acids (Met1, Pro15 and Arg147) every amino acid position has experienced a substitution. However, two groups of amino acids exhibit limited sequence variation and form distinct patches on the surface of the capsid. We propose that vaccines capable of directing antibodies to these patches may serve as universal vaccines for PCV2.

## 126 Results

127 **Recombinant PCV2 VLPs assemble and remain in the nucleus of expression system.** We sub-  
128 cloned the PCV2d capsid protein (CP) gene of C/2013/3 isolated in Taiwan (GenBank: AWD32058.1)  
129 into the mammalian expression plasmid pcDNA 3.4 in order to produce recombinant PCV2d VLP in  
130 mammalian cells (**Fig. 1A**). Transfection of suspension culture of HEK-293 mammalian cells with the  
131 plasmid results in the production of the CP and assembly of the VLP. To determine the location of  
132 VLP assembly (nucleus versus cytoplasm), we used immunofluorescence and Western blot analysis  
133 of transfected cells. The analysis was performed at three time points post-transfection: 24, 48, and 72  
134 hours. The mouse anti-PCV2 capsid monoclonal antibody was used as a probe directed to amino  
135 acids 49-125 of the CP (exact epitope location is proprietary information of GeneTex). The  
136 transfected cells were subsequently lysed at each of the time points and three cellular fractions  
137 isolated, whole cell lysate (WCL), cytoplasm (CE) and nuclear (NE) extracts. At 48 hours  
138 immunofluorescence expressed CP becomes evident. At this time point CP was found in both the  
139 nucleus and the cytoplasm; by 72 hours the nuclear compartment appeared enriched (Fig 2). These  
140 results were confirmed by Western Blot analysis. These results demonstrate that while translation is,  
141 as expected, in the cell cytoplasm the protein is subsequently transported into the nucleus where  
142 capsid assembly occurs and the VLP remains. To date PCV2 VLP has been produced using insect  
143 cells, yeast, or *E. coli* (11), thus expression of VLP using mammalian cells provides an analogous  
144 substrate to that utilized by natural PCV2 infection.

145 Analysis of purified PCV2d VLP and its protein composition was confirmed by SDS-PAGE and  
146 Western blot analysis (**Fig. 1B and C**). Further examination by negative stained electron microscopy  
147 showed homogeneous spherical particles with smooth edges, slightly rough surface with a diameter  
148 of ~19 nm (**Fig. 1D**). The CP described in this study possesses the amino acid sequence identified  
149 from a number of recently isolated and reported PCV2d virus genome entries in GenBank, such as

150 W233-12 isolated in Japan (BBE28610.1), CN-FJC011 isolated in China (AVZ66019.1), and  
151 England/15-P0222-09-14 isolated in England (ATN97185.1).

152  
153 **Cryo-electron microscopy and image reconstruction of PCV2d VLP.** We determined an  
154 icosahedral cryo-EM image reconstruction of purified PCV2d VLP to a resolution of 3.3 Å (**Fig. 3A**).  
155 The molecular envelope of the side chains allows us to confidently model the atomic coordinates of  
156 PCV2 (**Fig 3B**). The coordinates from the PCV2b crystal structure were manually fitted into the image  
157 reconstruction and appropriate modifications were performed to reflect the PCV2d amino acid  
158 sequence. Additional amino acids were built for the N-terminus and the fitted model was refined  
159 through several iterations of automatic refinement with Phenix suite and manual modeling using the  
160 program Coot (**Fig. 3B**). The final refinement statistics are shown in Table 1. We were able to model  
161 atomic coordinates from residue 36-231. Weak molecular envelopes preceding amino acid 36 and  
162 following amino acid 231 could be observed, but no models were built due to interpretation concerns.  
163 The PCV2 CP fold is the canonical viral jelly roll first visualized for the tobacco bushy stunt virus (11,  
164 20). The jelly roll can also be described as a  $\beta$ -sandwich that is composed of two  $\beta$ -sheets. Each  
165 sheet consists of four strands (BIDG and CHEF) (**Fig. 3C**) and has a slightly right handed twist. The  
166 60 CP pack together such that the  $\beta$ -sheets are normal to the  $T=1$  icosahedral particle. The loops  
167 connecting the strands BC, DE, FG and HI are 4 to 9 amino acids, while the loops connecting strands  
168 CD, EF and GH are 21 to 36 amino acids. The shorter loops define the surface of the capsid, while  
169 the longer loops are predominantly involved in CP-CP interaction. Given high sequence identity  
170 shared between the PCV2a, b and d sequences, it would be anticipated that no significant differences  
171 exist between their atomic coordinates. However, superimposing the subunits from these genotypes  
172 and generating root-mean standard deviation plots of equivalent C $\alpha$  atoms proves otherwise (**Fig 3C**)  
173 (9, 21). The regions that exhibit significant diversity correspond to two of the surface-exposed loops  
174 consisting of amino acids 85-91 (section of loop CD), and 188-194 (section of loop GH) (**Fig. 3C**).

175 The movement in loop CD and GH are coordinated, and a result of a single amino acid substitution at  
176 position 89 (loop CD) that is situated under loop GH. The larger amino acids of PCV2d (Leu89) and  
177 PCV2b (Arg89), as compared to PCV2a (Val89), push loop GH of PCV2d and PCV2b further away  
178 from loop CD. The C $\alpha$  atom of PCV2a Thr189-Ser190 and PCV2b Thr189-Ala190 (loop GH) are ~1.4  
179 and 1.3 Å apart, respectively. The C $\alpha$  atoms for amino acids 189-190 in PCV2a and PCV2d are  
180 closer to one another, because of the smaller size differential between PCV2d Leu89 and PCV2a  
181 Val89. The change in the loops position may be a response to the immune system.

### 182 **The capsid packages cellular nucleic acid and recognizes a Pu-Pu-Py-Py nucleotide sequence.**

183 A near-central reconstruction slice was extracted from the cryo-EM image reconstruction and the  
184 density trace of pixel values was calculated in the horizontal and vertical directions (**Fig 4A**). Based  
185 upon the central slice of the reconstruction, the PCV2 VLP outer diameter is approximately 18.5 nm  
186 assuming a roughly spherical shape for calculation. The outer volume is therefore estimated to be  
187  $3.3 \times 10^3 \text{ nm}^3$ . The inner diameter using the same spherical shape estimation has a diameter of  
188 approximately 13 nm. Therefore, the inner region volume is approximately  $1.2 \times 10^3 \text{ nm}^3$ . The radial  
189 profile of the image reconstruction indicates that a substantial amount of material is located within the  
190 capsid (**Fig. 4A**). We computationally measured the amount of material located inside the capsid by  
191 comparing the voxel count within the capsid shell to that inside the capsid -see methods and  
192 materials. A similar comparison performed for the asymmetric image reconstruction of the MS2  
193 bacteriophage (EMD-8397) allowed us to calibrate the amount of material in our capsid to a sample  
194 with known RNA content. EMD-8397 is of sufficient quality to model the majority of the ssRNA  
195 genome (22). Our analysis indicates that in addition to the 60-copies of amino acids 1-42, which are  
196 believed to be in the interior of the capsid shell, there is scattering from an additional ~384 kDa of  
197 material. This is equivalent to ~1,200nt of ribonucleic acid. We also determined the RNA-protein ratio  
198 of PCV2d VLP using absorption light spectroscopy after correcting for light scattering (23).

200 We then used adsorption spectroscopy to measure the content of the purified PCV2d VLP  
201 following the protocol described by Porterfield and Zlotnick (23). The measurements allow one to  
202 subtract scattering (absorbances at 360nm and 340nm) from the sample and calculate the amount of  
203 RNA (absorbance at 260nm) present as a ratio of the amount of protein (absorbance at 280nm)  
204 present. Five measurements were made to yield an average of 23.8 nucleotides per CP. This is  
205 equivalent to 1,428 nucleotides per capsid, and in agreement with our estimations using the cryo-EM  
206 image reconstruction of PCV2d.

207 To interpret the inner composition of the PCV2d VLP image reconstruction, we generated a  
208 molecular envelope (difference map) representing the inner composition of the capsid by subtracting  
209 a 3.3 Å molecular envelope calculated from our coordinates (amino acids 43-231) from our 3.3 Å  
210 cryo-EM image reconstruction (**Fig 4B, C**). Strong difference peaks are observed near the  
211 icosahedral 3-fold and between the 5- and 2-fold axes of symmetry. We model a short oligonucleotide  
212 (Pu-Pu-Py-Py ) into the difference peak between the 5- and 2-fold axes of symmetry. The backbone  
213 ribose and phosphates of the oligonucleotide form hydrogen bonds and electrostatic interactions with  
214 Gln46, Arg48, Lys102 and Arg214 of one subunit, and Arg147 and Thr149 of a neighboring subunit.  
215 The side chains from Arg48, Arg147 and Arg214 stack like a zipper to form a positive patch on the  
216 inner surface of the capsid. The charge on the patch is neutralized by the two phosphates in the RNA  
217 backbone. The second Pu of the oligonucleotide forms  $\pi$ -interactions with Tyr160 of the PCV2d CP  
218 (**Fig 4D**). Two observations support our model: the modeled coordinates demonstrate the nucleotide  
219 bases to stack and form  $\pi$ -bond overlap, and the coordinates of these nucleotides overlay with the  
220 coordinates of nucleotides that were modeled into the beak and feather disease virus (**BFDV**) crystal  
221 structure when the PCV2 and BFDV CP are superposed -BFDV is a member of the *Circoviridae*  
222 family and its CP shares 32% sequence identity with the PCV2 CP (24).

224 **The PCV2 N-terminus is in the interior of the capsid and located near the icosahedral 3-fold**

225 **axis of symmetry.** The N-terminus of *Circovirus* capsid proteins are highly charged and predicted to  
226 be an intrinsically disordered region -a region with no secondary structure (25). We recently provided  
227 experimental support for this prediction by measuring the circular dichroism spectrum of the PCV2b  
228 N-terminus peptide (amino acids 1-42) (Manuscript under review). The crystal structure and cryo-EM  
229 image reconstruction of the PCV2b VLP and the cryo-EM image reconstruction of the PCV2a VLP  
230 both strongly suggested that the N-terminus is located inside the capsid (9, 11, 26). Half of the amino  
231 acids in the N-terminus are composed of Arg or Lys amino acids; thus, its high positive charge and  
232 potential location suggests that it may be capable of interacting with nucleic acid packaged in the  
233 capsid. The difference peak near the 3-fold axes of symmetry are adjacent to the modeled N-terminus  
234 of PCV2 (amino acid 43), and we have modeled six amino acids into this difference peak to extend  
235 the N-terminus to amino acid 36 (**Fig. 4E**). The N-terminus begins as a single turn helix that descends  
236 into the inner portion of the capsid. Additional molecular envelope for the N-terminus can be observed;  
237 however, we refrain from modeling this section as we cannot confidently interpret the direction of the  
238 polypeptide chain and identify the amino acids by their side chain molecular envelope. The reduced  
239 quality of the molecular envelope in this region is most likely due to the N-terminus not adopting the  
240 icosahedral symmetry of the capsid. Unfortunately, symmetry expansion, signal subtraction, and  
241 focused classification of this region was unable to improve the quality of the molecular envelope.  
242 Consequently, we do not know the location of amino acids 1-35 of the CP. A recent manuscript by Mo  
243 *et al.* models the N-terminus of PCV2 near the icosahedral 5-fold axes of symmetry (19). We will  
244 discuss the discrepancy between the two models in the discussion section.

245 Difference maps calculated from the PCV2a and PCV2b image reconstructions display the  
246 tetranucleotide molecular envelope located between the icosahedral 2- and 5-fold axes of symmetry  
247 to be conserved (**Fig 5A-C**). Surprisingly, the molecular envelope for the PCV2a N-terminus is rotated  
248  $\sim 90^\circ$  with respect to its equivalents in the PCV2b and PCV2d image reconstructions (**Fig 5A-C**).



249 Radial plots of the image reconstructions suggest that the inner contents of the PCV2a image  
250 reconstruction consist of the least amount of packaged material (**Fig 5D**). Perhaps the distinct  
251 positioning of the N-terminus in the PCV2a image reconstruction is a result of the lesser amount of  
252 packaged material.

253

254 **PCV2a, b and d genotypes demonstrate different diversity and variability.** Several phylogenetic  
255 studies have compared the amino acid sequence of PCV2 CPs to differentiate PCV2 into genotypes  
256 (6, 7, 14). Indeed, Franzo and Segales recently identified eight PCV2 genotypes (a-h) (14). A report  
257 by Wang *et al.* mapped the sequence variation in 50 PCV2 CP sequences onto the crystal structure  
258 and identified regions of variability (8); however, since then a significant number of CP sequences  
259 have been deposited into GenBank that requires revisiting the analysis. We asked, do amino acids  
260 that exhibit the greatest diversity (lowest sequence identity) or greatest variability (AL2CO, entropy)  
261 cluster on the 3D structure of the CP, and is the clustering conserved among PCV2a, b, and d  
262 genotypes (27). We chose to concentrate on these three genotypes because the larger number of  
263 GenBank entries allow us to reach a statistically meaningful conclusion. We initiated our analysis by  
264 downloading the nucleotide sequences used by Franzo and Segales in their study (PCV2a: 675;  
265 PCV2b: 1984; PCV2d: 1491) from GenBank (14). We note that sequences arising from recombination  
266 have been removed by Franzo and Segales. We then converted the nucleic acid sequences to amino  
267 acid sequences using the NCBI ORFfinder program (28) and removed all redundant amino acid  
268 sequences from each genotype using the CD-HIT server (29). A total of 317 PCV2a, 501 PCV2b and  
269 368 PCV2d unique sequences were aligned for each genotype and were mapped onto the PCV2a,  
270 PCVb and PCV2d atomic coordinates (**Fig 6**). The PCV2a genotype demonstrates the greatest  
271 sequence diversity with the lowest sequence variability -the two most diverse sequences share 86.3%  
272 identity (AF364094.1 vs. AIQ85146.1) (**Fig 3C and 6A**). The most diverse positions are in loops BC,  
273 CD, EF, GH, and HI while the most variable positions are in loop CD. The high sequence diversity in



274 the apposed loops BC and HI is suggestive of a conformational epitope (*conf1*). Similarly, the high  
275 sequence diversity in the apposed loops CD and GH is suggestive of a conformational epitope  
276 (*conf2*). Indeed, Shang *et al.* demonstrated that PCV2 neutralizing antibodies 2B1, 7F4, and 6H9  
277 bound to PCV2 isolates NB0301, SX0201, HZ0301, HZ0201, TZ0601, JH0602, but not ISU-31 (30).  
278 The difference in sequence between ISU-31 and the remaining PCV2 isolates maps to loops CD, GH  
279 and HI. Consequently, antibodies 2B1, 7F4, and 6H9 may bind to either *conf1* or *conf2*. The PCV2b  
280 genotype exhibits a lesser sequence diversity, but a greater sequence variability –the two most  
281 diverse sequences share 84.5% identity (ABL07437.1 vs. ABR14586.1) (**Fig 3C and 6B**). The most  
282 diverse positions are in loop BC and the most variable positions are in loops BC, CD, DE, and HI. The  
283 PCV2d genotype exhibit distinct sequence diversity and variability when compared to the PCV2a and  
284 b genotypes -the two most diverse sequences share 83.3% identity (KP824717.1 vs. AVR51420.1).  
285 For example, the PCV2b genotype exhibits greater sequence diversity in loop BC and variability in  
286 loop CD, while PCV2d exhibits greater sequence diversity in loop GH and diversity in loop EF (**Fig 3C  
287 and 6C**). Not shown in Fig 4 are the last few C-terminal amino acids of the CP, as none of the  
288 structural studies have been successful in visualizing these amino acids. These amino acids are  
289 highly variable within each genotype, and between genotypes (2, 5, 7, 14). PCV2b and PCV2d also  
290 exhibit greater sequence variability in the inner surface of the capsid when compared to PCV2a (**Fig.  
291 6A-C**).

292  
293 **Highly conserved amino acids form patches on the capsid surface.** The sequences discussed  
294 above were expanded to include all PCV2 GenBank entries, then reduced to a unique set of amino  
295 acid sequences (1,278 entries). The sequence alignment was used to generate a WebLogo diagram  
296 to observe the sequence conservation among all PCV2 genotypes (**Fig. 7A**). The sequences with the  
297 greatest diversity (GenBank entries: AVZ65995.1 and ALK04312.1) share 74.4% sequence identity.  
298 While the WebLogo diagram successfully demonstrates the frequency of occurrence for the most

299 popular amino acid(s) at each position, it dampens the frequency of occurrence for the less popular  
300 amino acids. Indeed, substitutions are observed within the hydrophobic core of the protein, at the  
301 intersubunit interface, and amino acids on the outer and inner surface of the capsid. Moreover, only  
302 Met1, Pro15 and Arg147 are absolutely conserved. The analysis suggests that the capsid is capable  
303 of tolerating mutations at nearly every position while remaining an infectious virus. To visualize the  
304 sequence conservation at each amino acid position, we plotted the sequence alignment information  
305 onto the PCV2d atomic coordinates using the ConSurf server (**Fig. 7B**) (31). The figure displays a  
306 significant degree of nonconserved substitutions. Regions colored in red experience the greatest  
307 degree of change while regions in blue experience the least degree of change. Highly conserved  
308 amino acids are peppered across the structure; however, two sets of amino acids form patches on  
309 the surface of the capsid. These include Tyr55, Thr56, Met71 and Arg73, and Pro82, Thr170, Gln188,  
310 Thr189 and Val193 (**Fig. 7C**). The presence of these patches suggests that they may play important  
311 biological roles in the PCV2 life-cycle (e.g. cellular interaction, capsid dynamics/stability). Given the  
312 conservation of these amino acids, it would be interesting to test if vaccines capable of inducing  
313 antibody production to these patches (conformational epitopes) are able to neutralize all PCV2  
314 genotypes (**Fig. 7C**).

315  
316 **Evolutionary coupled mutations differentiate the PCV2 genotypes.** The large number of CP  
317 sequences allowed us to ask if any of the amino acid positions are evolutionary constrained (32). For  
318 evolutionary constrained amino acids, mutation of one amino acid requires mutation of the other  
319 amino acids. In the simplest of cases this may be because the amino acids pack against one another  
320 in the structure of the protein, such that mutation to a larger amino acid in one position requires  
321 mutation to a smaller amino acid in the second position for proper packing to occur. Such information  
322 can be used to predict the fold of a protein or identify functionally important sites (32-34). Evolutionary  
323 coupling (**EC**) measurements determined from the 1,278 unique sequences indicates that two

324 independent locations in the structure demonstrate coupling. The first location consists of amino acids  
325 53 and 215, and the second location consists of amino acids 77, 80, 89, 90, 190 and 191 (**Fig. 7C**).  
326 Sequence differences in the second location are responsible for the structural diversity observed  
327 between PCV2a and PCV2b/d in loops CD and GH (**Fig. 3C**) (9, 21). The EC results may indicate  
328 that the coupled amino acids are functionally relevant. Solvent accessible surface area calculations  
329 with the GetArea server (<http://curie.utmb.edu/getarea.html>) indicates that amino acids 77, 80, 89,  
330 and 90 are more than 75% buried, while amino acids 190 and 191 are exposed to the solvent (35).  
331 Amino acids 190 and 191 help define a neutralizing epitope on the surface of the capsid -see below.  
332

333 **Sequence variation on the capsid surface may be a response to neutralizing antibodies.** We  
334 used the atomic coordinates of PCV2d to identify amino acids on the surface of the VLP with side  
335 chains exposed to solvent (53, 55-56, 58-64, 70-71, 73, 75, 77-78, 82-83, 85, 88-89, 102, 113, 115,  
336 123, 127, 131-137, 148, 155, 156, 158, 161, 166, 168-170, 188-191, 194, 204, 206-208, 210, 229-  
337 234). These amino acids may be antigenic determinants, as the side chains provide a surface for  
338 antibody interaction. Continuous sequences encompassing the above amino acids are shown in **Fig.**  
339 **8A-H**, with the most variable amino acids highlighted (53, 57, 59, 60, 63, 75, 77, 88, 89, 131, 133,  
340 134, 136, 169, 190, 191, 211, 215, 232). Mahe *et al.* used PEPSCAN analysis of PCV1 and PCV2 CP  
341 to identify linear epitopes of CP (amino acids 65-87, 113-139, and 193-207) capable of interacting  
342 with PCV2 antisera (13). Khayat *et al.* used this information to identify the amino acids of the PCV2  
343 CP crystal structure (amino acids 70, 71, 77, 78, 113, 115, 127, 170, 206 and 207) that may be  
344 responsible for the observed PEPSCAN reactivity (11). Antigenic subtyping experiments by Lefebvre  
345 *et al.* and Saha *et al.*, where panels of neutralizing monoclonal antibodies are tested for their ability to  
346 bind to different strains of PCV2, demonstrated that amino acid positions 59, 63, 88, 89, 130, 133,  
347 206 and 210 are responsible for differentiating antibody binding (36, 37). Huang *et al.* demonstrated  
348 that amino acid 59 resides in a conformational epitope for the neutralizing antibody 8E4 (38). Franzo

349 *et. al.* described the evolution of PCV2 before and after the introduction of vaccination to involve  
350 changes in amino acids 59, 191, 206, 210, 228 and 232 (39). Except for amino acid 130, which is  
351 buried in a subunit-subunit interface, these amino acids are on the surface of the capsid and undergo  
352 extensive substitutions. It is certainly possible that a combination of two or more proximal regions  
353 may help define conformational epitopes (e.g. **Fig 8A, D, G; Fig 8E-F; Fig 8B, D; Fig 8 D, H; Fig 8C,**  
354 **H; Fig 8C, F**).

## 355

## 356 Discussion

357 Porcine circovirus 2 genome encodes for four known proteins: a replicase (ORF1) responsible for  
358 genome replication, a capsid protein (ORF2) responsible for generating the capsid shell, and an  
359 ORF3 and ORF4 that are believed to regulate cellular apoptosis (40, 41). PCV2 demonstrates the  
360 ability to rapidly mutate and evolve into novel genotypes -an ability that is governed by the  
361 accumulation of point mutations (42, 43) and genome recombination (44). Phylogenetic analysis of  
362 the PCV2 CP sequence indicates that eight genotypes are distributed globally (PCV2a-h) (14). The  
363 larger deposition of entries for PCV2b in GenBank suggests that it is the dominant genotype;  
364 however, the recent decrease in PCV2b and increase in PCV2d depositions suggests that there may  
365 be a shift from PCV2b to PCV2d (5). Given the history of shifts in PCV2 genotypes, it would not be  
366 too surprising if additional shifts occurred. To understand why the genotype shifts are occurring, it is  
367 necessary to establish an expression and purification protocol to rapidly acquire large quantities of  
368 PCV2 VLP for structural and biophysical studies. It is important to structurally characterize the PCV2  
369 capsid as it is the entity under selective pressure by the environment (e.g. immune system and  
370 cellular interaction), and sequence information sometimes is not enough to distinguish differences  
371 between genotypes. Consequently, we have established a rapid and robust mammalian expression  
372 system for producing large quantity of PCV2 VLP. The study described in this paper is the first  
373 system where mammalian cells have been utilized to generate large quantity of VLP. The relatively

374 easy and rapid protocol of the mammalian expression system provides a tremendous advantage to  
375 the timely and involved protocol necessary for baculovirus generation. The mammalian expression  
376 system described here can generate VLP four days from when the expression plasmid is attained,  
377 whereas the fastest baculovirus expression protocol can generate VLP in eight days (45). The  
378 decrease in time necessary to generate VLP is particularly advantageous when mutagenesis  
379 experiments are to be performed. Our expression protocol can also be used to generate capsids  
380 assembled as a multivalent mosaic that simultaneously displays neutralizing epitopes of several  
381 genotypes. Immunofluorescence and Western blot analysis of CP expression revealed that CP can  
382 be detected in the cytoplasm at 24 hours, but only detect in the nucleus at 72 hours. This suggests  
383 that the VLP is unable to exit from the nucleus of mammalian cells within the first 72 hours of  
384 expression.

385 The molecular envelope of the 3.3 Å PCV2d cryo-EM image reconstruction allows us to  
386 confidently model amino acids 36 to 231, and a Pu-Pu-Py-Py tetranucleotide. Comparison of the  
387 PCV2a, b and d atomic coordinates attained from cryo-EM studies identifies differences in the  
388 conformations of the surface-exposed loops CD (amino acids 86-91) and GH (amino acids 188-194)  
389 (**Fig. 3C**). The movement of these loops are coupled to one another and thus suggestive that the  
390 difference is not happenstance. The difference between PCV2a and PCV2b in the positions of these  
391 loops provides a structural description for the genotype shift observed in 2003 from PCV2a to PCV2b  
392 (15, 16). Such a difference could not have been identified by sequence analysis alone. Indeed, the  
393 structures indicate that substitution at a single position (amino acid 89) is responsible for the  
394 difference in loop positions. The movement in loop position may be a response to neutralizing  
395 antibodies -see below. The Pu-Pu-Py-Py tetranucleotide coordinates modeled into our PCV2 image  
396 reconstruction is the first observation of ordered nucleic acid in a PCV2 capsid. The nucleic acid is  
397 most likely to be RNA as VLP assembly occurs in the nucleus of the mammalian expression system.  
398 Hydrogen bond and electrostatic Interactions are observed between Gln46, Arg48, Lys102 and

399 Arg214 of one subunit, and Arg147 and Thr149 of a neighboring subunit with the backbone of the  
400 tetranucleotide. The base from the second Pu of the tetranucleotide forms  $\pi$ -interactions with the side  
401 chain of Tyr160. All four bases of the tetranucleotide make  $\pi$ -interactions. Interestingly, the placement  
402 of the coordinates with respect to the CP is nearly identical to that of the beak feather disease virus -  
403 another member of the *Circoviridae* family (24). The position for some of the amino acids that interact  
404 with the PCV2 nucleic acid overlaps with the position of amino acids that interact with the BFDV  
405 ssDNA, while others are unique to PCV2 or BFDV. PCV2 and BFDV share 32% sequence identity.

406 Amino acids 36-42 modeled into the N-terminus of the PCV2d image reconstruction are  
407 located inside the PCV2 capsid near the icosahedral 3-fold axes of symmetry (**Fig 4D**). Amino acids  
408 43-50 form the B  $\beta$ -strand of the viral jelly-roll and remain in the interior of the capsid until amino acid  
409 51, which is exposed on the surface of the capsid (11, 26). Interestingly, there is a discrepancy  
410 between our model and that recently described by Mo *et al.* (19). Mo *et al.* model amino acids 33-42  
411 to interact with amino acids 17-27 near the icosahedral 5-fold axes of symmetry. Moreover, Mo *et al.*  
412 model amino acids 43-49 to form a loop that points to the exterior of the capsid near the 3-fold axes  
413 of symmetry. Unfortunately, a direct comparison between our model and that of Mo *et al.* cannot be  
414 made because the coordinates for their N-terminus model has not been deposited into the PDB or  
415 EMDB (19). The different models may be a result of the different expression and assembly systems  
416 used by these studies; we use a mammalian expression system where the VLP assemble in the  
417 nucleus of the cell whereas Mo *et al.* use an *E. coli.* expression system with *in vitro* VLP assembly.  
418 We note that our model is also consistent with the cryo-EM image reconstructions of PCV2a and  
419 PCV2b VLP attained from insect cell expression systems -where amino acids 43-50 are modeled in  
420 the interior rather than exterior of the capsid (9, 26). Further studies are necessary to clarify the  
421 discrepancies between the two models.

422 Comparison of difference maps calculated from subtracting the cryo-EM image reconstructions  
423 of PCV2a, b, and d from their respective atomic coordinates (amino acids 42-231) reveals similarities

424 and differences between the interior of PCV2a and PCV2b/d (**Fig 5A-C**). All difference maps identify  
425 similar molecular volumes describing the tetranucleotide we've modeled into the PCV2d image  
426 reconstruction. However, the positions of the molecular envelopes for the PCV2a N-termini are  
427 different than those of PCV2b/d. While the N-termini for the three genotypes locate near the intra-  
428 facet icosahedral 3-fold axes of symmetry, the PCV2a molecular envelope is rotated 90° clockwise  
429 such that it points away from the 3-fold axes of symmetry (**Fig 5A-C**). Possibly, the position of the  
430 PCV2a N-terminus is correlated to the lesser amount of material present inside the PCV2a capsid  
431 (**Fig 5D**). If so, the N-terminus may act as a sensing switch for regulating capsid assembly. We are  
432 exploring this possibility with biochemical and structural studies.

433 Phylogenetic analysis of the PCV2 CP sequences has recently been used to identify eight  
434 genotypes (a-h) (14). We mapped the diversity and variability present in the CP sequences of the  
435 PCV2a, b, and d genotypes onto their respective atomic coordinates (**Fig 6A-C**) (9, 26). The plots,  
436 coupled with published work, suggest two conformational epitopes on the capsid surface. The plots  
437 also demonstrate that PCV2a exhibits the greatest sequence diversity but lowest sequence identity  
438 (**Fig 6A**). Both PCV2b and d exhibit high sequence variability (**Fig 6B and 6D**). The increased  
439 variability in the PCV2 genotypes may be a result of the selective pressure induced by the vaccination  
440 program in 2006 (46). The number of CP sequence entries into GenBank was dominated by PCV2a  
441 prior to the introduction of the program but was quickly shadowed by PCV2b entries. The number of  
442 PCV2d entries is greater than PCV2b entries for 2016 (14). We note that the sequence diversity  
443 observed in these three genotypes are sufficiently high such that a single sequence is not truly  
444 representative of the genotype when one considers antibody escape mutations. The diversity in CP  
445 sequences suggests that PCV2 may indeed be regarded as viral quasispecies (47).

446 Alignment of 1,278 unique PCV2 CP sequences indicates that only three amino acids (Met1,  
447 Pro15 and Arg147) are absolutely conserved, and that the remaining positions in the sequence have  
448 undergone mutations (**Fig 7B**). This demonstrates the remarkable plasticity of the capsid structure to



undergo mutation while maintaining an infectious virus, and thus highlights the capacity of PCV2 to respond to natural selection. The sequence analysis coupled with the structural information identify conserved sites on the capsid surface (*conf1* and *conf2*) that may be taken advantage of for designing vaccines capable of eliciting broadly neutralizing antibodies (**Fig 7C**). Evolutionary coupling analysis of the sequence alignment identified two regions that underwent co-evolution. One of these regions correlates with the structural diversity observed between PCV2a and PCV2b/d in loops CD and GH (**Fig 7D**). The continuous regions on the surface of the capsid exhibiting high sequence diversity and variability may be linear epitopes for neutralizing antibodies; however, the proximity of some of these regions (**Fig 8A, 8D, and 8G**) could also form conformational epitopes. Clearly, high-resolution structures of mAb (or Fab) in complex with PCV2 are needed to differentiate these possibilities.

Currently used vaccines have been produced using the capsid from a PCV2a genome and several studies have reported immunization failures as a consequence of PCV2d infection (7, 48, 49). In addition, there is always the possibility of low vaccine efficacy due to genomic shift and this factor must be accounted for in future vaccine development. G. Franzo *et al* (39) studied the vaccine-derived selection pressure caused by vaccination. They reported that high mutation rates at amino acid positions 59, 191, 206 for PCV2a and 131, 228 for PCV2b reduced the binding of antibody that previously bound to the capsid; possibly causing the immune escape from vaccine protection (**Fig 7**) (50). Consequently, a platform for expression of PCV2d VLP is warranted.

The VLP expression system has multiple application. For example, the system can be used to generate capsids assembled as a multivalent mosaic that simultaneously displays neutralizing epitopes of several genotypes (i.e. transfect cells with multiple plasmids expressing different CP genotypes). Additionally, the 40 amino acids at the N-terminus can be replaced with specific tags to package biologics, expressed in the same cells, into the capsid. Such nanostructures could be



473 utilized for diagnostics or delivery systems. There have been multiple reports demonstrating that VLP  
474 can assemble if the N-terminus of the CP is replaced with other sequences (11, 51).

475 In summary, we describe a mammalian assembly system of PCV2d VLPs, perform structural  
476 analysis based on cryo-EM image reconstruction, demonstrate a structural difference between the  
477 PCV2a, b, and d genotypes, model a tetranucleotide and a section of the N-terminus into the image  
478 reconstruction, demonstrate that the capsid packages nucleic acid, visualize the diversity and  
479 variability of the deposited PCV2 CP sequences on the CP structure, and identify conserved patches  
480 on the surface that may be taken advantage of for developing universal PCV2 vaccines.

481

## 482 **Materials and methods**

483 **Cells, Capsid Gene, Plasmid and antibody.** Suspension cultures of Expi293F human cells (Life  
484 Technologies, CA) were grown in serum-free Expi293 expression medium (Life Technologies, CA) at  
485 37°C in a 5% CO<sub>2</sub> environment and agitated at 150 rpm in Erlenmeyer flasks. The porcine circovirus  
486 type 2 (PCV2) gene encoding the capsid protein (GenBank: AWD32058.1) was chemically  
487 synthesized using a codon-optimized sequence by Blue Heron Technologies (Bothell, WA). The  
488 recognition site for NheI and the Kozak sequence were added right upstream from the start codon,  
489 and the recognition site for NotI was incorporated after the termination codon. The synthesized Cap  
490 gene was recovered from the transport plasmid by a double digestion with NheI and NotI restriction  
491 enzymes and sub-cloned after gel purification into the mammalian expression plasmid pcDNA3.4 cut  
492 with the same enzymes. The ligated plasmid was transformed into MAX Efficiency Stbl2 Cells (Life  
493 Technologies) and a correct clone was identified via restriction enzyme analysis and verified by  
494 sequencing.

495  
496 **Virus Like Particle (VLP) Production and Purification.** PCV2 VLPs were produced in a suspension  
497 culture of Expi293F mammalian cells following transient transfection with the plasmid pcDNA3.4-  
498 PCV2 (**Fig. 1**). Expi293F cells were seeded at the concentration of  $2 \times 10^6$  cells/ml and cultured for  
499 16h prior to transfection. Plasmid DNA (1 µg/ml) was diluted in a volume of Opti-MEM representing  
500 5% of the total volume of the culture. Separately, polyethylenimine (PEI) was prepared in an  
501 equivalent volume of Opti-MEM (4 µg/ml). After 5 min of incubation at room temperature, the PEI  
502 solution was added dropwise to the tube containing the DNA and after 30 min of incubation at RT the  
503 mixture was added to the cell suspension in a dropwise manner. Twenty-four hours after transfection,  
504 Valproic acid sodium salt (VPA) was added to the cell culture to a final concentration of 3.75 mM to  
505 inhibit cell proliferation. Seventy-two hours post-transfection the cells were pelleted by centrifugation  
506 at 2,000g for 15 min, and then washed one time with phosphate buffered saline (PBS) and spun

507 again at 2,000g for 15 min. The cell pellet was re-suspended in PBS and then subjected to three  
508 freeze (-80°C) and thaw (37°C) cycles. Subsequently, the cells were further fragmented by three  
509 cycles of sonication and clarified by two successive centrifugations, first at 2,000g for 15 min followed  
510 by 8,000g for 15 min. The PCV2 VLPs contained in the clarified supernatant were further purified by  
511 ultracentrifugation on a two-layer CsCl density gradient: lower layer, 5 ml of 1.4 g/ml CsCl and upper  
512 layer, 10ml of 1.25 g/ml of CsCl both prepared in 10mM Tris-HCl, (pH 7.9). Samples were loaded  
513 onto the gradient and spun at 15°C for 4h at 140,000g using a SW28 rotor (Beckman Coulter, CA).  
514 The VLPs appeared as an opaque band at the interface of the 1.25 and 1.4 g/ml CsCl layers and  
515 were collected by piercing the tube with an 18G needle and syringe. The collected solution was mixed  
516 with 37 % CsCl in 10 mM Tris-HCl (pH 7.9) to final volume of 12 ml and then spun at 15°C for 16hr at  
517 155,000g using a SW 41Ti rotor (Beckman Coulter, CA). The VLPs were detected at the lower part of  
518 the tube and recovered as described above. Collected VLP material was dialyzed against 10mM Tris-  
519 HCl pH 7.9 and 150mM NaCl at 10°C overnight using a Slide-A-Lyzer Cassette. Purified PCV2 VLPs  
520 were concentrated and buffer exchanged to phosphate buffered saline (PBS) using Amicon Ultra-4  
521 centrifugal filter devices (Merck Millipore, MA). PCV2 VLP samples were stored in 50-100 µl aliquots  
522 at -80°C.

523  
524 **Western Blot and Coomassie Blue Stain.** Purified VLPs were mixed with loading buffer, heated at  
525 100°C for 5 min and run on a 4 to 12% Bis-Tris SDS-polyacrylamide gel (Life Technologies, CA).  
526 Loading amounts of proteins were 1 µg for Coomassie staining and 0.5 µg – for Western Blot. After  
527 electrophoretic separation, the gel was stained with Coomassie blue or proteins electro-transferred  
528 onto a 0.45 µm nitrocellulose membrane (Life Technologies LC2001). The membrane was then  
529 blocked with 5 % non-fat milk in TBST (10 mM Tris-HCl, 130 mM NaCl, and 0.05% Tween-20, pH  
530 7.4) for 1h at (20°C) followed by an overnight incubation at (20°C) in primary Rabbit anti-porcine  
531 circovirus antibody (Cab 183908, Abcam, UK) diluted with blocking buffer. Membranes were washed

3 times with TBST and then incubated for 2 h with secondary antibody (goat anti-rabbit IgG HRP conjugated, 1:1,000) diluted in blocking buffer. Finally, membranes were washed 3 times with TBST and developed with ECL Western blot system (Life Technologies, CA) according to manufacturer's instructions. The stained gel and immune blot images were acquired with a FluorChem Imager instrument (Protein Simple, CA).

**Immunofluorescence.** The HEK293 adherent culture cells were transfected with pcDNA3.4-PCV2d plasmid using Amaxa Nucleofector II instrument by Lonza (program A-23). The transfected cell were plated on 6-well plate, each well contained cover slip to performed immunofluorescence study on transfected cells. The cover slips were removed 24, 48 and 72 hours post transfection and fixed with ice-cold acetone for 10 min. Expressed PCV2d CP was detected by using Mouse anti-PCV2 CP monoclonal antibody (GeneTex, GTX634211). The Donkey anti Mouse IgG conjugated with Alexa488 dye (Jackson ImmunoResearch) used as a secondary antibody. DAPI staining allowed us to localize the nuclei.

Images were acquired with a Neo sCMOS camera (6.45 $\mu$ m pixels, 560MHz, Andor Technology) on a Nikon TiE inverted microscope (Nikon Inc., Mellville, NY) using 40X (NA 0.95) plan apochromat objectives. 14-16bit images were scaled linearly to highlight features of interest and converted to 8-bit copies for figure assembly. Devices were controlled by Elements software (Nikon Instruments).

**Negative Staining and TEM Examination.** 5  $\mu$ L of pCV2-2 VLP samples was applied to CF200-CU carbon film 200 mesh copper grids (Electron Microscopy Science) for 1 min and the grids were then washed with 200  $\mu$ L of 50 mM of Na Cacodylate buffer and then strained immediately with 50  $\mu$ L of 0.5% uranyl acetate for 1 min. The grids were examined by a JOEL 2100 transmission electron microscope operating at 200 kV with an Orius 2048  $\times$  2048 pixel CCD (Gatan Inc., Pleasanton, CA).

557

558 **Cryo-EM Data Collection.** Frozen hydrated samples of PCV2d VLPs were prepared on Quantifoil R  
559 2/2, 200 mesh copper grids (Electron Microscopy Science). A 4  $\mu$ l sample of the VLP was applied to  
560 the grid blotted for 3 seconds and flash frozen in liquid ethane using a FEI Vitrobot instrument. The  
561 grids were stored in liquid nitrogen until data collection. Data was collected at cryogenic temperatures  
562 on a FEI Titan Krios, operating at 300 kV, with Gatan K2 camera post a GIF quantum energy filter  
563 with a width of 15 eV. Data collection was performed with the Leginon suite (52).

564

### 565 **Image Reconstruction.**

566 The MotionCor2 package was used for correct for particle motion (53). Default parameters and dose  
567 weighting were used for the correction, with the patch 5 option, and the first frame of each movie was  
568 discarded during the alignment. The particles were selected automatically using Gautomatch v0.53,  
569 and contrast transfer function (CTF) estimation was performed on the aligned micrographs using Gctf  
570 v0.50 (54). Relion 3.0 was used to extract 23,358 300x300 pixel particles from the dose-weighted  
571 micrographs using the coordinates identified by Gautomatch. Reference free 2D classification was  
572 performed with Relion 3.0 (55). Non-default options for this step included a diameter of 250 Å and  
573 128 classes were requested (56). An initial model was generated to 60 Å resolution using the PCV2  
574 crystal structure (PDB entry 3R0R) with the *molmap* function of UCSF Chimera (57). 3D classification  
575 was carried out on 7196 particles using Relion 3.0 with a diameter of 250 Å, 3 classes, and C1  
576 symmetry. A single class with 4,442 particles exhibited the highest resolution. These particles were  
577 used for a high-resolution image reconstruction with Relion 3.0. Again, a diameter of 250 Å and I1  
578 symmetry were used with the remaining default parameters of Relion 3.0. A binary mask was created  
579 using the *relion\_mask\_create* program of Relion 3.0. The binary mask for postprocessing was  
580 generated as follows: 1) the high resolution image reconstruction was low pass filtered to 15 Å  
581 resolution using *relion\_image\_handler* (Relion 3.0), 2) the lowest threshold at which noise exterior to

582 the PCV2 capsid was identified for this volume using UCSF Chimera, 3) *relion\_mask\_create* (Relion  
583 3.0) was used to convert this volume into a binary mask with the identified threshold, mask dialation  
584 by 7 pixels and 2 soft edge pixels. The resulting mask was then inspected with UCSF Chimera to  
585 ensure that no internal cavities existed.

586 Local resolution was calculated with the program MonoRes. The same binary mask used  
587 during the postprocessing with Relion was used for the calculation. A resolution range of 3.3 Å to 5.3  
588 Å was used (58).

### 589 **Structure refinement**

590 The atomic coordinates for the crystal structure of PCV2b crystal structure (PDB entry 3R0R) were  
591 modified using Coot (59). The biological matrices necessary to generate a VLP are present in the  
592 PDB and were used by Coot to generate a VLP of PCV2d. UCSF Chimera was used to manually  
593 dock the VLP into the symmetrized image reconstructions. The resulting coordinates were iteratively  
594 refined using *phenix.real\_space\_refine* from the Phenix software package with non-crystallographic  
595 symmetry (NCS) constraints applied, and manual fitting with Coot (60).

### 596 **Sequence alignment, entropy calculation and evolution coupling**

597 The nucleotide sequences used by Franzo and Segales were downloaded from GenBank (14). The  
598 NCBI ORFfinder suite was used to identify ORFs in each sequence. The ORFs identified from each  
599 entry was filtered to identify the CP ORF. The resulting ORFs were submitted to CD-HIT to identify a  
600 unique set of sequence for each genotype identified by Franzo and Segales (29). The sequence  
601 diversity and variability (entropy) for each genotype was calculated using the AL2CO routine built into  
602 the UCSF Chimera suite (57). The atomic coordinates of PCV2a, b, and d were used for the three  
603 genotypes studied (PDB entries 3JCI, 6DZU and 6OLA).

604 The PCV2 CP sequences were expanded by performing a protein Blast search with the  
605 sequence of PCV2d and the organism common name Porcine circovirus 2 (taxid:85708) filter (61). A

total of 1,966 PCV2 sequences were identified. Partial sequences, sequences with names containing “putative”, “P3”, “unknown”, and “P27.9” were manually removed. Sequence alignment was performed on the remaining sequences using MUSCLE with default parameters (62). Sequences that generated gaps, possessed more than ten amino acids with a distinct sequence, or had no similar sequences were manually removed. This was done in order to remove spurious errors/artifacts that may have occurred during the sequencing process (i.e. artificial recombination during PCR with *Taq* polymerase (63)). Several rounds of alignment and deletion were performed to remove such sequences. The final set of sequences was combined with the pool of sequences identified by Franzo and Segales, and submitted to the CD-HIT server to attain a unique set of 1,278 sequences. The final round of alignment was performed with Clustal Omega with default parameters (64). Evolutionary coupling calculations could not be successfully performed with the EVcouplings server (evfold.org) because of the limited range in the Expect (E) value present the sequence (i.e. the sequences are too similar). Consequently, plmc was used to generate coevolution and covariation within the sequences. The L2 lambda for fields and couplings used were 0.01 and 16.0, respectively, and a maximum number of 100 iterations were performed. The results were converted for visualization with EVzoom using MATLAB 2019 and the scripts provided by the plmc program (33). The resulting matrix was visualized with EVzoom (33), and structural covariance was visually confirmed with UCSF Chimera (57).

### **Measuring the interior content of the capsid**

The radial profile of the image reconstruction was calculated using the *bradial* program from the Bsoft package (65). The radial profile in the interior of the capsid is quite strong and likely to arise from the PCV2 N-terminus (amino acids 1-36) and additional material. We assumed that cellular RNA was present in the capsid to stabilize the positive charge of the capsid interior (66). To calculate the amount of RNA present in the PCV2 capsid, we used the asymmetric image reconstruction of MS2 (EMD-8397) as a standard -as the ssRNA genome of MS2 is resolved in this image reconstruction



(22). The intent is to adjust the threshold of the MS2 image reconstruction to account for 100% mass content in the capsid shell, then identify the threshold at which 100% mass content of the genome is accounted for. This threshold value is then used to measure the RNA content of the PCV2 image reconstruction after the PCV2 image reconstruction has been adjusted such that 100% mass content in the capsid shell is accounted for.

First, a 15 Å molecular envelope was generated for the MS2 capsid shell (PDB entry: 5TC1) with the UCSF Chimera *vop* command (57). The envelope was converted to the binary mask with the Relion 3.0 *relion\_mask\_create* program (55). The mask was applied to the image reconstruction using the Bsoft *bmask* program to extract the voxels pertaining to the capsid shell (65). The EMAN *volume* program was used to rescale the map densities to a threshold of 1.0 for a mass of 2.54 MDa - the total mass of 180 capsid proteins ( $T=3$ ) and one maturation protein (22). The map densities of the unmasked image reconstruction was adjusted, via visual inspection with UCSF Chimera and scaling with Bsoft *bimg* program, such that its shell region was identical to the masked image reconstruction at threshold of 1.0 (2.54 MDa) (57, 65). The molecular envelope of the genome was isolated by applying an inverted mask of the capsid shell to remove the capsid shell, and a spherical mask to remove the solvent. The masks were applied with the Bsoft *bmask* program (65). The mass content of the remaining volume was calculated using the EMAN *volume* program (67). The Oligo Calc: Oligonucleotide Properties Calculator was used to determine the molecular weight of the MS2 genome (GenBank entry: NC\_001417.2) to be 1.10 MDa (68). From this value we determined that at a threshold of 0.781 the MS2 genome is fully accounted for in the EMD-8397 image reconstruction whose map distribution has been adjusted to account for 100% mass content of the capsid shell.

Following a similar procedure for the PCV2 image reconstruction (amino acids 43-231), we determined that a threshold of 0.781 corresponds to a mass of 730 kDa in the capsid interior. From this mass we subtracted the mass of the 60 N-termini (amino acids 1-42, 5.8 kDa) that are believed to be inside the capsid and contribute to the envelope. If we assume that the remaining mass of 384



656 kDa is from RNA, this equates to approximately 1,200 nt. Approximate MW of ssRNA = (#nucleotides  
657 x 320.5) + 159.

658 **Measurement of nucleic acid content in purified VLP.** The ratio of nucleic acid to protein  
659 (260nm:280nm) was determined after correction for scattering at 340nm and 360nm according to the  
660 protocol established by Porterfield and Zlotnick (23). Briefly, an adsorption scan of three sample were  
661 collected two times each from 640nm to 220nm using a VWR UV-1600 PC Spectrophotometer. The  
662 mass of the CP was calculated to be 28,057.04 Da using the amino acid sequence and the ExPasy  
663 ProtParam server (69). The extinction coefficient of the CP was calculated using the same server  
664 (70), which yielded a value of 48,360 M<sup>-1</sup> cm<sup>-1</sup>. A 260 nm / 280 nm ratio for pure protein (0.6) was  
665 used to calculate the extinction coefficient for RNA 29,016 M<sup>-1</sup> cm<sup>-1</sup>.

666

## 667 Captions

668 **Figure 1. Expression of PCV2 virus-like particles in mammalian cells.** A) Plasmid generated for  
669 expression of PCV2d capsid protein. The codon optimized PCV2d capsid gene was synthesized  
670 (Blue Heron Technologies, Bothell, WA) and cloned into expression vector pcDNA3.4 (Fisher  
671 Scientific). B) Protein expression was conducted in transiently transfected suspension cultures of  
672 Expi293 cells (Life Technologies). SDS-PAGE analysis of purified PCV2d VLPs (1 ug protein) and  
673 stained with Coomassie blue. C) SDS-PAGE analysis of purified PCV2d VLPs (0.5 ug protein)  
674 transferred to a nitrocellulose membrane and probed for a Western Blot with primary rabbit anti PCV2  
675 capsid polyclonal antibody (Cab 183908, Abcam, UK). D) Negative stained electron microscopy  
676 micrograph of purified VLP stained with uranyl acetate. Particle sizes are approximately 19 nm  
677 diameter.

678 **Figure 2. Location of expressed PCV2d capsid protein in transfected HEK293 cell.** Transfected  
679 cells were fixed with acetone and labeled with mouse anti-PCV2 capsid monoclonal antibody to probe  
680 the capsid (green) and with DAPI (blue) to localize the nuclei. A) images from cells 48 hours post  
681 transfection with immunofluorescence from the capsid shown by the green channel and fluorescence  
682 from DAPI (nucleus labeling) by the blue channel. B) same image showing information from the green  
683 channel (capsid), C) same image showing information from the blue channel labeling (nucleus). D)  
684 images from cells 72 hours post transfection with immunofluorescence identical to A). E) same image  
685 showing information from the green channel (capsid), F) same image showing information from the  
686 blue channel (nucleus). G) Western blot analysis of whole cell lysate (WCL), cytoplasm (CE) and  
687 nuclear extracts (NE) collected 24, 48 and 72 hours post transfection. Top panel) The samples were  
688 probed for tyrosinated microtubules. Bottom panel) The samples were probed for PCV2 capsid  
689 protein. The presence of tyrosinated microtubules in CE but not in NE provided the quality control of  
690 cell fractionation.

691 **Figure 3. Structural study of the PCV2d VLP.** A) Icosahedral cryo-EM image reconstruction of the  
692 purified PCV2d VLP colored according to the local resolution. The gradient color map on the left-hand  
693 side indicates the resolution for the colors. B) Extracted molecular envelope for a subunit  
694 demonstrates the quality of the image reconstruction, where amino acid side chains can clearly be  
695 seen. The atomic coordinates have been modeled into the image reconstruction. C) Structural  
696 overlay of the PCV2a (cyan), PCV2b (green), and PCV2d (salmon). Amino acids 89, 189 and 190 are  
697 shown as stick models. The  $\beta$ -strands (bold) loops (bold-italic) are labeled. Figures generated using  
698 UCSF Chimera and ChimeraX (57, 71).

700 **Figure 4. The inner content of the PCV2 capsid.** A) A radial profile of the PCV2d cryo-EM image  
701 reconstruction. The capsid interior and shell are identified by assessing the cryo-EM image  
702 reconstruction. The inset is a central slice extracted from the cryo-EM image reconstruction, with the  
703 density trace of pixel values calculated in the horizontal and vertical directions. The radial profile  
704 demonstrates that number of voxels within the capsid is comparable to the capsid shell; thus, a  
705 substantial amount of material is located within the capsid interior. B) Strong difference peaks  
706 identified in the inner capsid. The icosahedral 5-, 3- and 2-fold axes of symmetry are identified by  
707 yellow pentagons, triangles and ellipses, respectively. A CP subunit is shown as a dark grey tube. We  
708 interpret the green colored difference peak to be a Pu-Pu-Py-Py tetranucleotide, the blue colored  
709 difference peak to be amino acids 36-41 of the PCV2 N-terminus, and the red colored difference peak  
710 to be “unidentified”. C) Side view showing the CP subunit and the difference peaks. D) Close up of  
711 the tetranucleotide that has been modeled into the difference peak (green) located near the 3-fold  
712 axes of symmetry, and the CP amino acids in proximity. Gln46 (strand B), Arg48 (strand B), Lys102  
713 (strand D), and Arg214 (strand I) of one subunit, and Thr149 (strand F) and Arg147 (strand F) from a  
714 neighboring subunit form hydrogen bonds and electrostatic interaction with the phosphate backbones  
715 of the tetranucleotide. Tyr160 (strand I) forms  $\pi$ -bond overlap with the first Py in the tetranucleotide.

716 E) Close up of the PCV2 N-terminus modeled into the difference peak (blue) located near the 3-fold  
717 axes of symmetry. Amino acids 36-42 are labeled.

718 **Figure 5. Inner capsid difference peaks of PCV2a, PCV2b and PCV2d.** Comparing the difference  
719 peaks in the inner capsid of PCV2a (A), PCV2b (B) and PCV2d (C) reveals a conserved location for  
720 the tetranucleotide molecular envelope (green) and differences for the N-termini molecular envelope  
721 (blue). The orientation of the PCV2b and PCV2d N-termini are conserved; however, the N-termini of  
722 the PCV2a are rotated  $\sim 90^\circ$  clockwise. The icosahedral symmetry elements are shown using the  
723 same convention as Fig 4B. The molecular envelopes for a single subunit are painted with bold  
724 colors. D) Radial plots of PCV2a (blue), PCV2b (black), and PCV2d (red). The plots are normalized  
725 and scaled to one another to simplify the comparison. The PCV2d image reconstruction possesses  
726 the greatest amount of content within its capsid, while the PCV2a image reconstruction possesses  
727 the least amount of content within its capsid.

728 **Figure 6. Sequence diversity and variability in the PCV2a, b, d genotypes.** A) Amino acid  
729 sequence alignment information plotted on the PCV2a, b, and d coordinates. The red-to-blue color  
730 gradient represents diversity (sequence identity) -gradient shown at the bottom of the image. The size  
731 of the atoms and tube represent variation (sequence entropy), with smaller atoms/tubes representing  
732 lower entropy and larger atoms/tubes representing greater entropy. Lower entropy indicates fewer  
733 amino acids present in the alignment at a position, and larger entropy indicates more amino acids  
734 present at a position. The plotting of variation allows one to appreciate the frequency of different  
735 amino acids at each position. Top, amino acids facing the capsid exterior. Bottom, amino acids facing  
736 the capsid interior. A) Attained from 317 unique CP entries plotted on the surface of the PCV2a  
737 atomic coordinates (PDB entry 3JCI). B) attained from 501 unique CP entries plotted on the surface  
738 of the PCV2b atomic coordinates (PDB entry 6DZU). C) attained from 368 unique CP entries plotted  
739 on the surface of the PCV2d atomic coordinates (PDB entry 6OLA).

740 **Figure 7. Sequence comparison of 1,278 PCV2 capsid protein entries plotted on the PCV2d**

741 **atomic coordinates.** A) The sequence alignment by the Clustal Omega server was used to generate  
742 the WebLogo diagram to demonstrate sequence variation. The horizontal axis of the alignment  
743 indicates the amino acid and the vertical axis indicates its observed frequency. Bars connecting  
744 amino acids 77, 80, 99, 91, 190, 191 (black), and 53, 215 (grey) represent the evolutionary coupled  
745 clusters shown in panel D. B) Space filling model of the PCV2d atomic coordinates with a modified  
746 color-coding scheme of ConSurf. The color bar at the bottom indicates the degree of conservation  
747 determined by the ConSurf server. The yellow box indicates insufficient data as determined by the  
748 server (1 indicates poorly conserved and 9 indicates highly conserved mutations). The top right  
749 quadrant of the VLP surface has been removed to display the sequence conservation in the interior of  
750 the capsid. Image made with UCSF ChimeraX and colored using flat lighting. C) Highly conserved  
751 amino acid on the capsid surface (*conf1*: amino acids 82,170,188,189 and 193 in green, *conf2*: amino  
752 acids 55, 56, 51 and 73 in blue) form patches. Antibodies directed against these patches  
753 (conformational epitopes) may exhibit broadly neutralizing capability. D) Ribbon cartoon of a PCV2d  
754 subunit. Amino acids in stick are evolutionary coupled together, as determined using the plmc.  
755 MATLAB 2019, and EVzoom programs. Figures generated using UCSF ChimeraX (71).

756 **Figure 8. Sites of antibody neutralization.** Top) Space filling model of the PCV2d atomic  
757 coordinates with the surface exposed amino acids colored in cyan, sequence variable amino acids in  
758 purple, and antibody binding amino acids in yellow. Middle) WebLogo diagram of 11 amino acids  
759 containing the solvent exposed amino acids. Bottom) Amino acids on the surface of the capsid. The  
760 image concentrates on continuous amino acids, but the proximity of two such regions can define a  
761 conformational epitope.

762  
763 **Acknowledgement**

764 Funds responsible for supporting these studies were provided by NIH National Institute of General  
765 medical Sciences and National institute of Allergy and Infectious Diseases (5SC1AI114843) to RK, by  
766 Grant Number 5G12MD007603-30 from the National Institute on Minority Health and Health  
767 Disparities to RK and PG, and by TechnoVax, Inc. and Huvépharma to JMG, KW, and BG. Data  
768 collection for the PCV2d VLP was performed at the Simons Electron Microscopy Center and National  
769 Resource for Automated Molecular Microscopy located at the New York Structural Biology Center,  
770 supported by grants from the Simons Foundation (349247), NYSTAR, and the NIH National Institute  
771 of General Medical Sciences (GM103310).

772

773

## 774 Refereces

- 775 1. Ellis J. 2014. Porcine circovirus: a historical perspective. *Vet Pathol* 51:315-27.
- 776 2. Rosario K, Breitbart M, Harrach B, Segales J, Delwart E, Biagini P, Varsani A. 2017. Revisiting  
777 the taxonomy of the family Circoviridae: establishment of the genus Cyclovirus and removal of the  
778 genus Gyrovirus. *Arch Virol* 162:1447-1463.
- 779 3. Breitbart M, Delwart E, Rosario K, Segales J, Varsani A, Ictv Report C. 2017. ICTV Virus  
780 Taxonomy Profile: Circoviridae. *J Gen Virol* 98:1997-1998.
- 781 4. Palinski R, Pineyro P, Shang P, Yuan F, Guo R, Fang Y, Byers E, Hause BM. 2017. A Novel  
782 Porcine Circovirus Distantly Related to Known Circoviruses Is Associated with Porcine Dermatitis  
783 and Nephropathy Syndrome and Reproductive Failure. *J Virol* 91.
- 784 5. Wei C, Zhang M, Chen Y, Xie J, Huang Z, Zhu W, Xu T, Cao Z, Zhou P, Su S, Zhang G. 2013.  
785 Genetic evolution and phylogenetic analysis of porcine circovirus type 2 infections in southern  
786 China from 2011 to 2012. *Infect Genet Evol* 17:87-92.
- 787 6. Franzo G, Cortey M, Olvera A, Novosel D, Castro AM, Biagini P, Segales J, Drigo M. 2015.  
788 Revisiting the taxonomical classification of Porcine Circovirus type 2 (PCV2): still a real challenge.  
789 *Virol J* 12:131.
- 790 7. Xiao CT, Halbur PG, Opriessnig T. 2015. Global molecular genetic analysis of porcine circovirus  
791 type 2 (PCV2) sequences confirms the presence of four main PCV2 genotypes and reveals a  
792 rapid increase of PCV2d. *J Gen Virol* 96:1830-41.
- 793 8. Wang N, Zhan Y, Wang A, Zhang L, Khayat R, Yang Y. 2016. In silico analysis of surface  
794 structure variation of PCV2 capsid resulting from loop mutations of its capsid protein (Cap). *J Gen*  
795 *Virol* 97:3331-3344.
- 796 9. Liu Z, Guo F, Wang F, Li TC, Jiang W. 2016. 2.9 A Resolution Cryo-EM 3D Reconstruction of  
797 Close-Packed Virus Particles. *Structure* 24:319-28.
- 798 10. Khayat R, Johnson JE. 2011. Pass the jelly rolls. *Structure* 19:904-6.

- 799 11. Khayat R, Brunn N, Speir JA, Hardham JM, Ankenbauer RG, Schneemann A, Johnson JE. 2011.  
800 The 2.3-angstrom structure of porcine circovirus 2. *J Virol* 85:7856-62.
- 801 12. Guo L, Lu Y, Huang L, Wei Y, Liu C. 2011. Identification of a new antigen epitope in the nuclear  
802 localization signal region of porcine circovirus type 2 capsid protein. *Intervirology* 54:156-63.
- 803 13. Mahe D, Blanchard P, Truong C, Arnauld C, Le Cann P, Cariolet R, Madec F, Albina E, Jestin A.  
804 2000. Differential recognition of ORF2 protein from type 1 and type 2 porcine circoviruses and  
805 identification of immunorelevant epitopes. *J Gen Virol* 81:1815-24.
- 806 14. Franzo G, Segales J. 2018. Porcine circovirus 2 (PCV-2) genotype update and proposal of a new  
807 genotyping methodology. *PLoS One* 13:e0208585.
- 808 15. Beach NM, Meng XJ. 2012. Efficacy and future prospects of commercially available and  
809 experimental vaccines against porcine circovirus type 2 (PCV2). *Virus Res* 164:33-42.
- 810 16. Patterson AR, Opriessnig T. 2010. Epidemiology and horizontal transmission of porcine circovirus  
811 type 2 (PCV2). *Anim Health Res Rev* 11:217-34.
- 812 17. Opriessnig T, Xiao CT, Gerber PF, Halbur PG. 2013. Emergence of a novel mutant PCV2b  
813 variant associated with clinical PCVAD in two vaccinated pig farms in the U.S. concurrently  
814 infected with PPV2. *Vet Microbiol* 163:177-83.
- 815 18. Matzinger SR, Opriessnig T, Xiao CT, Catanzaro N, Beach NM, Slade DE, Nitzel GP, Meng XJ.  
816 2016. A chimeric virus created by DNA shuffling of the capsid genes of different subtypes of  
817 porcine circovirus type 2 (PCV2) in the backbone of the non-pathogenic PCV1 induces protective  
818 immunity against the predominant PCV2b and the emerging PCV2d in pigs. *Virology* 498:82-93.
- 819 19. Mo X, Li X, Yin B, Deng J, Tian K, Yuan A. 2019. Structural roles of PCV2 capsid protein N-  
820 terminus in PCV2 particle assembly and identification of PCV2 type-specific neutralizing epitope.  
821 *PLoS Pathog* 15:e1007562.
- 822 20. Harrison SC, Olson AJ, Schutt CE, Winkler FK, Bricgone G. 1978. Tomato bushy stunt virus at  
823 2.9Å resolution. *Nature* 279:368-373.



- 824 21. Dhindwal S, Avila B, Feng S, Khayat R. 2019. Porcine circovirus 2 uses a multitude of weak  
825 binding sites to interact with heparan sulfate, and the interactions do not follow the symmetry of  
826 the capsid. *Journal of Virology* doi:10.1128/jvi.02222-18.
- 827 22. Dai X, Li Z, Lai M, Shu S, Du Y, Zhou ZH, Sun R. 2017. In situ structures of the genome and  
828 genome-delivery apparatus in a single-stranded RNA virus. *Nature* 541:112-116.
- 829 23. Porterfield JZ, Zlotnick A. 2010. A simple and general method for determining the protein and  
830 nucleic acid content of viruses by UV absorbance. *Virology* 407:281-8.
- 831 24. Sarker S, Terron MC, Khandokar Y, Aragao D, Hardy JM, Radjainia M, Jimenez-Zaragoza M, de  
832 Pablo PJ, Coulibaly F, Luque D, Raidal SR, Forwood JK. 2016. Structural insights into the  
833 assembly and regulation of distinct viral capsid complexes. *Nat Commun* 7:13014.
- 834 25. Rosario K, Schenck RO, Harbeitner RC, Lawler SN, Breitbart M. 2015. Novel circular single-  
835 stranded DNA viruses identified in marine invertebrates reveal high sequence diversity and  
836 consistent predicted intrinsic disorder patterns within putative structural proteins. *Front Microbiol*  
837 6:696.
- 838 26. Dhindwal S, Avila B, Feng S, Khayat R, Jung JU. 2019. Porcine Circovirus 2 Uses a Multitude of  
839 Weak Binding Sites To Interact with Heparan Sulfate, and the Interactions Do Not Follow the  
840 Symmetry of the Capsid. *Journal of Virology* 93.
- 841 27. Pei J, Grishin NV. 2001. AL2CO: calculation ofpositional conservation in a protein sequence  
842 alignment. *Bioinformatics* 17:700-712.
- 843 28. Sayers EW, Barrett T, Benson DA, Bolton E, Bryant SH, Canese K, Chetvernin V, Church DM,  
844 DiCuccio M, Federhen S, Feolo M, Fingerman IM, Geer LY, Helmberg W, Kapustin Y, Landsman  
845 D, Lipman DJ, Lu Z, Madden TL, Madej T, Maglott DR, Marchler-Bauer A, Miller V, Mizrachi I,  
846 Ostell J, Panchenko A, Phan L, Pruitt KD, Schuler GD, Sequeira E, Sherry ST, Shumway M,  
847 Sirotkin K, Slotta D, Souvorov A, Starchenko G, Tatusova TA, Wagner L, Wang Y, Wilbur WJ,

- 848 Yaschenko E, Ye J. 2011. Database resources of the National Center for Biotechnology  
849 Information. *Nucleic Acids Res* 39:D38-51.
- 850 29. Niu B, Fu L, Li W, Gao Y, Huang Y. 2010. CD-HIT Suite: a web server for clustering and  
851 comparing biological sequences. *Bioinformatics* 26:680-682.
- 852 30. Shang SB, Jin YL, Jiang XT, Zhou JY, Zhang X, Xing G, He JL, Yan Y. 2009. Fine mapping of  
853 antigenic epitopes on capsid proteins of porcine circovirus, and antigenic phenotype of porcine  
854 circovirus type 2. *Mol Immunol* 46:327-34.
- 855 31. Ashkenazy H, Abadi S, Martz E, Chay O, Mayrose I, Pupko T, Ben-Tal N. 2016. ConSurf 2016:  
856 an improved methodology to estimate and visualize evolutionary conservation in macromolecules.  
857 *Nucleic Acids Res* 44:W344-50.
- 858 32. Hopf TA, Scharfe CP, Rodrigues JP, Green AG, Kohlbacher O, Sander C, Bonvin AM, Marks DS.  
859 2014. Sequence co-evolution gives 3D contacts and structures of protein complexes. *Elife* 3.
- 860 33. Hopf TA, Ingraham JB, Poelwijk FJ, Schärfe CPI, Springer M, Sander C, Marks DS. 2017.  
861 Mutation effects predicted from sequence co-variation. *Nature Biotechnology* 35:128.
- 862 34. Shamsi Z, Moffett AS, Shukla D. 2017. Enhanced unbiased sampling of protein dynamics using  
863 evolutionary coupling information. *Sci Rep* 7:12700.
- 864 35. Fraczekiewicz R, Braun W. 1998. Exact and efficient analytical calculation of the accessible  
865 surface areas and their gradients for macromolecules. *Journal of Computational Chemistry*  
866 19:319-333.
- 867 36. Saha D, Huang L, Bussalleu E, Lefebvre DJ, Fort M, Van Doorselaere J, Nauwynck HJ. 2012.  
868 Antigenic subtyping and epitopes' competition analysis of porcine circovirus type 2 using  
869 monoclonal antibodies. *Vet Microbiol* 157:13-22.
- 870 37. Lefebvre DJ, Costers S, Van Doorselaere J, Misinzo G, Delputte PL, Nauwynck HJ. 2008.  
871 Antigenic differences among porcine circovirus type 2 strains, as demonstrated by the use of  
872 monoclonal antibodies. *J Gen Virol* 89:177-87.

- 873 38. Huang LP, Lu YH, Wei YW, Guo LJ, Liu CM. 2011. Identification of one critical amino acid that  
874 determines a conformational neutralizing epitope in the capsid protein of porcine circovirus type 2.  
875 *Bmc Microbiology* 11.
- 876 39. Franzo G, Tucciarone CM, Cecchinato M, Drigo M. 2016. Porcine circovirus type 2 (PCV2)  
877 evolution before and after the vaccination introduction: A large scale epidemiological study. *Sci*  
878 *Rep* 6:39458.
- 879 40. Teras M, Viisileht E, Pahtma-Hall M, Rump A, Paalme V, Pata P, Pata I, Langevin C, Ruutel  
880 Boudinot S. 2018. Porcine circovirus type 2 ORF3 protein induces apoptosis in melanoma cells.  
881 *BMC Cancer* 18:1237.
- 882 41. Pan Y, Li P, Jia R, Wang M, Yin Z, Cheng A. 2018. Regulation of Apoptosis During Porcine  
883 Circovirus Type 2 Infection. *Front Microbiol* 9:2086.
- 884 42. Duffy S, Shackelton LA, Holmes EC. 2008. Rates of evolutionary change in viruses: patterns and  
885 determinants. *Nat Rev Genet* 9:267-76.
- 886 43. Rodriguez-Carino C, Duffy C, Sanchez-Chardi A, McNeilly F, Allan GM, Segales J. 2011. Porcine  
887 circovirus type 2 morphogenesis in a clone derived from the I35 lymphoblastoid cell line. *J Comp*  
888 *Pathol* 144:91-102.
- 889 44. Cai L, Ni J, Xia Y, Zi Z, Ning K, Qiu P, Li X, Wang B, Liu Q, Hu D, Yu X, Zhou Z, Zhai X, Han X,  
890 Tian K. 2012. Identification of an emerging recombinant cluster in porcine circovirus type 2. *Virus*  
891 *Res* 165:95-102.
- 892 45. Scholz J, Suppmann S. 2017. A new single-step protocol for rapid baculovirus-driven protein  
893 production in insect cells. *BMC Biotechnol* 17:83.
- 894 46. Karuppanan AK, Opriessnig T. 2017. Porcine Circovirus Type 2 (PCV2) Vaccines in the Context  
895 of Current Molecular Epidemiology. *Viruses* 9.

- 896 47. Correa-Fiz F, Franzo G, Llorens A, Segales J, Kekarainen T. 2018. Porcine circovirus 2 (PCV-2)  
897 genetic variability under natural infection scenario reveals a complex network of viral  
898 quasispecies. *Sci Rep* 8:15469.
- 899 48. Seo HW, Park C, Kang I, Choi K, Jeong J, Park SJ, Chae C. 2014. Genetic and antigenic  
900 characterization of a newly emerging porcine circovirus type 2b mutant first isolated in cases of  
901 vaccine failure in Korea. *Arch Virol* 159:3107-11.
- 902 49. Opriessnig T, Gerber PF, Xiao CT, Halbur PG, Matzinger SR, Meng XJ. 2014. Commercial  
903 PCV2a-based vaccines are effective in protecting naturally PCV2b-infected finisher pigs against  
904 experimental challenge with a 2012 mutant PCV2. *Vaccine* 32:4342-8.
- 905 50. Franzo G, Cecchinato M, Martini M, Ceglie L, Gigli A, Drigo M. 2014. Observation of high  
906 recombination occurrence of Porcine Reproductive and Respiratory Syndrome Virus in field  
907 condition. *Virus Res* 194:159-66.
- 908 51. Zhang H, Qian P, Liu L, Qian S, Chen H, Li X. 2014. Virus-like particles of chimeric recombinant  
909 porcine circovirus type 2 as antigen vehicle carrying foreign epitopes. *Viruses* 6:4839-55.
- 910 52. Suloway C, Shi J, Cheng A, Pulokas J, Carragher B, Potter CS, Zheng SQ, Agard DA, Jensen  
911 GJ. 2009. Fully automated, sequential tilt-series acquisition with Legion. *J Struct Biol* 167:11-8.
- 912 53. Zheng SQ, Palovcak E, Armache JP, Verba KA, Cheng Y, Agard DA. 2017. MotionCor2:  
913 anisotropic correction of beam-induced motion for improved cryo-electron microscopy. *Nat*  
914 *Methods* 14:331-332.
- 915 54. Zhang T, Gu Y, Fan H. 2016. Effect of impurities and post-experimental purification in SAD  
916 phasing with serial femtosecond crystallography data. *Acta Crystallogr D Struct Biol* 72:789-94.
- 917 55. Scheres SH. 2012. A Bayesian view on cryo-EM structure determination. *J Mol Biol* 415:406-18.
- 918 56. Scheres SH. 2012. RELION: implementation of a Bayesian approach to cryo-EM structure  
919 determination. *J Struct Biol* 180:519-30.

- 920 57. Pettersen EF, Goddard TD, Huang CC, Couch GS, Greenblatt DM, Meng EC, Ferrin TE. 2004.  
921 UCSF Chimera--a visualization system for exploratory research and analysis. *J Comput Chem*  
922 25:1605-12.
- 923 58. Vilas JL, Gomez-Blanco J, Conesa P, Melero R, Miguel de la Rosa-Trevin J, Oton J, Cuenca J,  
924 Marabini R, Carazo JM, Vargas J, Sorzano COS. 2018. MonoRes: Automatic and Accurate  
925 Estimation of Local Resolution for Electron Microscopy Maps. *Structure* 26:337-344 e4.
- 926 59. Emsley P, Cowtan K. 2004. Coot: model-building tools for molecular graphics. *Acta Crystallogr D*  
927 *Biol Crystallogr* 60:2126-32.
- 928 60. Afonine PA, Headd JJ, Terwilliger TC, Adams PC. 2013. Computational Crystallography  
929 *Newsletter* 4:43-44.
- 930 61. Johnson M, Zaretskaya I, Raytseis Y, Merezhuk Y, McGinnis S, Madden TL. 2008. NCBI BLAST:  
931 a better web interface. *Nucleic Acids Res* 36:W5-9.
- 932 62. Edgar RC. 2004. MUSCLE: multiple sequence alignment with high accuracy and high throughput.  
933 *Nucleic Acids Res* 32:1792-7.
- 934 63. Martin DP, Lemey P, Lott M, Moulton V, Posada D, Lefevre P. 2010. RDP3: a flexible and fast  
935 computer program for analyzing recombination. *Bioinformatics* 26:2462-3.
- 936 64. Sievers F, Wilm A, Dineen D, Gibson TJ, Karplus K, Li W, Lopez R, McWilliam H, Remmert M,  
937 Soding J, Thompson JD, Higgins DG. 2011. Fast, scalable generation of high-quality protein  
938 multiple sequence alignments using Clustal Omega. *Mol Syst Biol* 7:539.
- 939 65. Heymann JB. 2001. Bsoft: image and molecular processing in electron microscopy. *J Struct Biol*  
940 133:156-69.
- 941 66. Tarasova E, Farafonov V, Khayat R, Okimoto N, Komatsu TS, Taiji M, Nerukh D. 2017. All-Atom  
942 Molecular Dynamics Simulations of Entire Virus Capsid Reveal the Role of Ion Distribution in  
943 Capsid's Stability. *J Phys Chem Lett* 8:779-784.

- 944 67. Ludtke SJ, Baldwin PR, Chiu W. 1999. EMAN: semiautomated software for high-resolution single-  
945 particle reconstructions. *J Struct Biol* 128:82-97.
- 946 68. Kibbe WA. 2007. OligoCalc: an online oligonucleotide properties calculator. *Nucleic Acids Res*  
947 35:W43-6.
- 948 69. Gasteiger E, Hoogland C, Gattiker A, Duvaud S, Wilkins MR, Appel RD, Bairoch A. 2005. *Protein*  
949 *Identification and Analysis Tools on the ExPASy Server*. Humana Press.
- 950 70. Pace CN, Vajdos F, Fee L, Grimsley G, Gray T. 1995. How to measure and predict the molar  
951 absorption coefficient of a protein. *Protein Sci* 4:2411-23.
- 952 71. Goddard TD, Huang CC, Meng EC, Pettersen EF, Couch GS, Morris JH, Ferrin TE. 2018. UCSF  
953 ChimeraX: Meeting modern challenges in visualization and analysis. *Protein Sci* 27:14-25.
- 954
- 955

705 **Table 1.**

|                                   | Unliganded PCV2                                      |
|-----------------------------------|------------------------------------------------------|
| Number of Micrographs             | 799                                                  |
| Defocus range                     | -0.68 to -2.81 $\mu\text{m}$                         |
| Total dose                        | 64 e <sup>-</sup> $\text{\AA}^{-2}$                  |
| Dose rate                         | 6.4 e <sup>-</sup> $\text{\AA}^{-2} \text{sec}^{-1}$ |
| Number of Frames                  | 50                                                   |
| Particles extracted               | 23,358                                               |
| Particles used for reconstruction | 4,442                                                |
| FSC resolution *                  | 3.3 $\text{\AA}$                                     |
| B-factor sharpening †             | -125.9 $\text{\AA}^2$                                |
| CC                                | 84.6%                                                |
| B-factor average                  | 64.6 $\text{\AA}^2$                                  |
| RMSD ‡                            | 0.013                                                |
| RMSD §                            | 1.38                                                 |
| Molprobitiy ¶                     | 2.18                                                 |
| EMRinger                          | 5.1                                                  |
| Clashscore                        | 1.7                                                  |
| Ramachandran favored (%)          | 91.8%                                                |
| Ramachandran allowed (%)          | 8.2%                                                 |
| EMDB                              | 20113                                                |
| PDB                               | 6OLA                                                 |

706 \* Fourier shell correlation reported by Relion 3.0 using the gold standard method at a CC of 0.143.

707 † The B-factor sharpening reported by Relion 3.0 during the post-refinement process

708 ‡ The root-mean standard deviation for bonds reported by Phenix.real\_space\_refine

709 § The root-mean standard deviation for angles reported by Phenix.real\_space\_refine

710 ¶ Molprobitiy Overall score

711

712



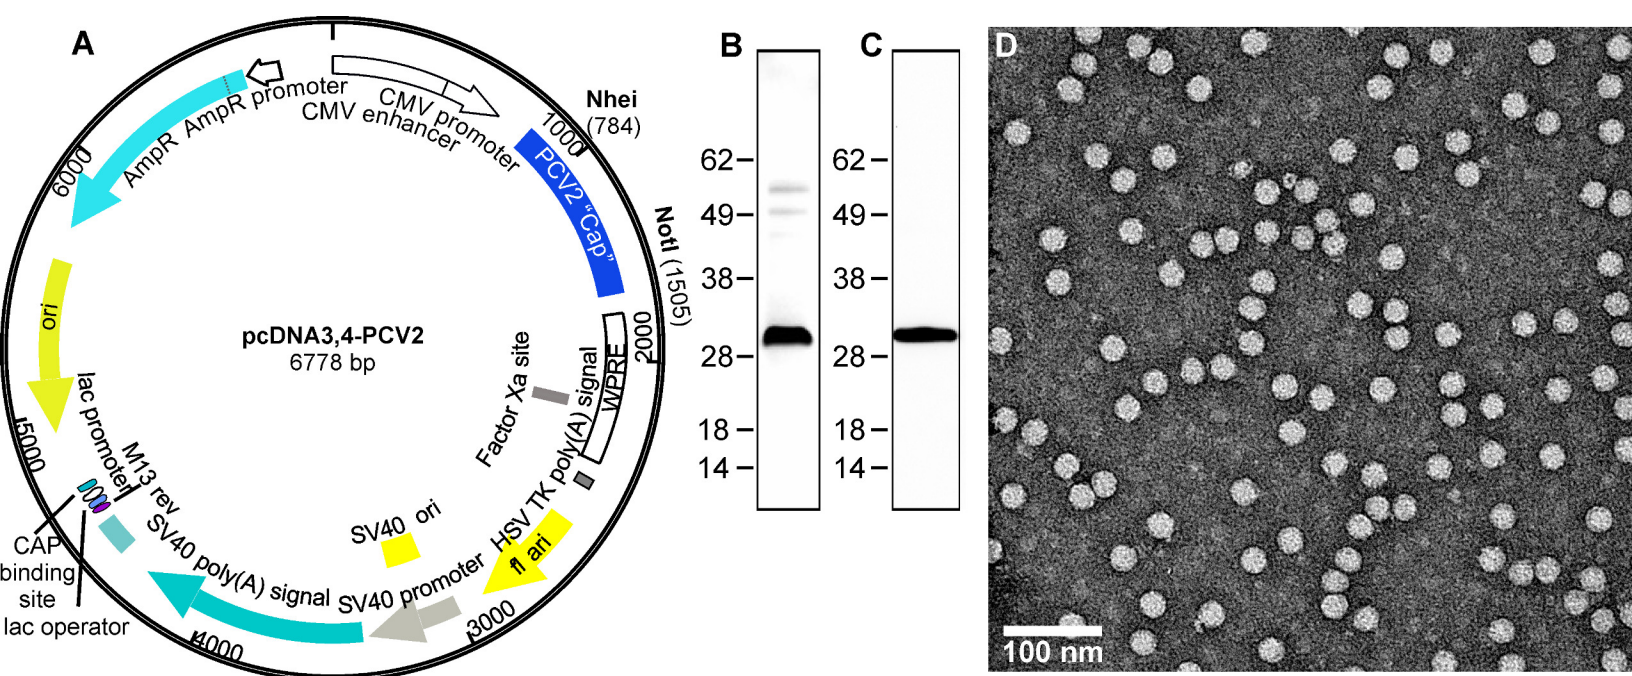

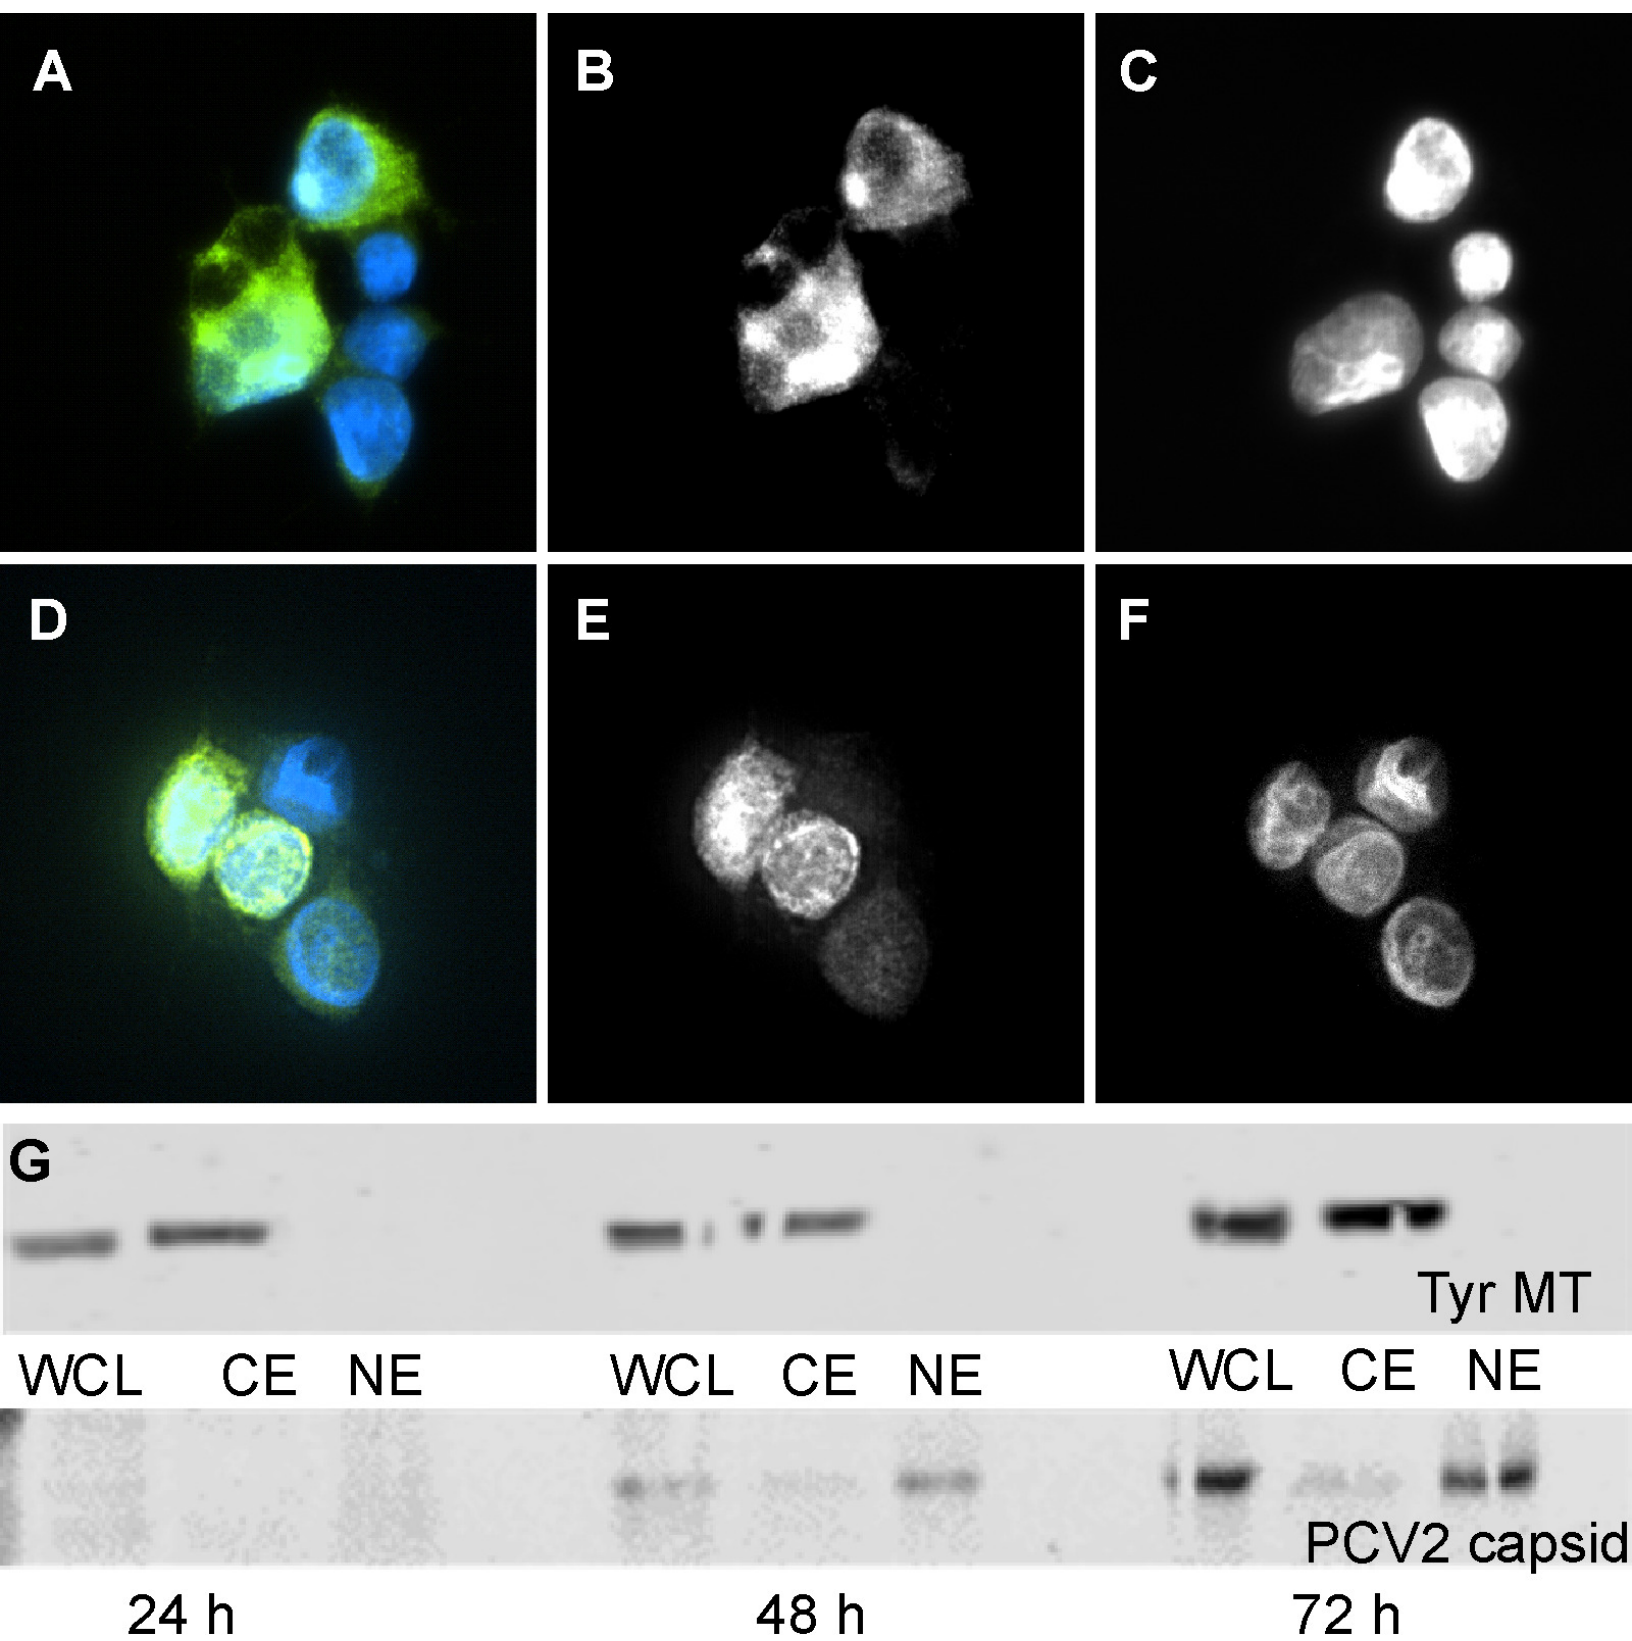

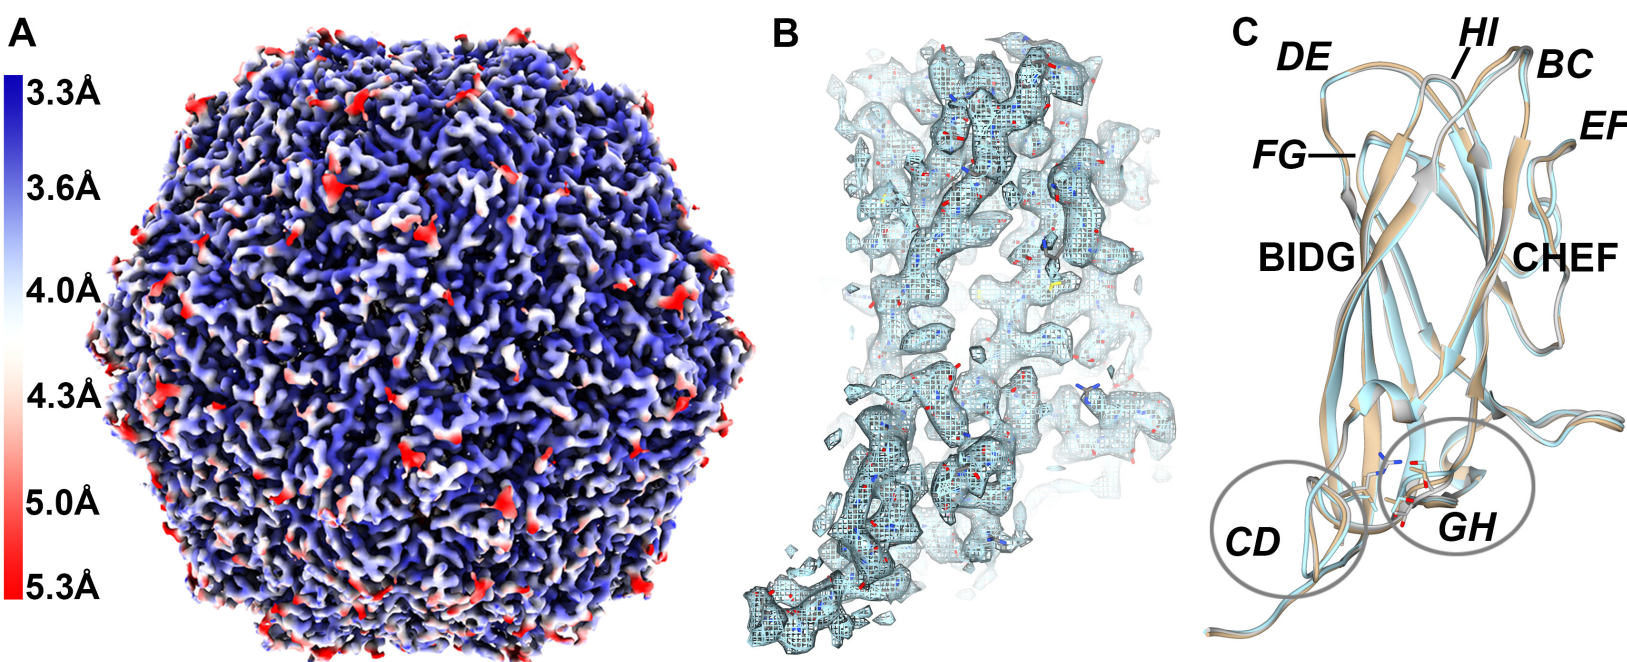



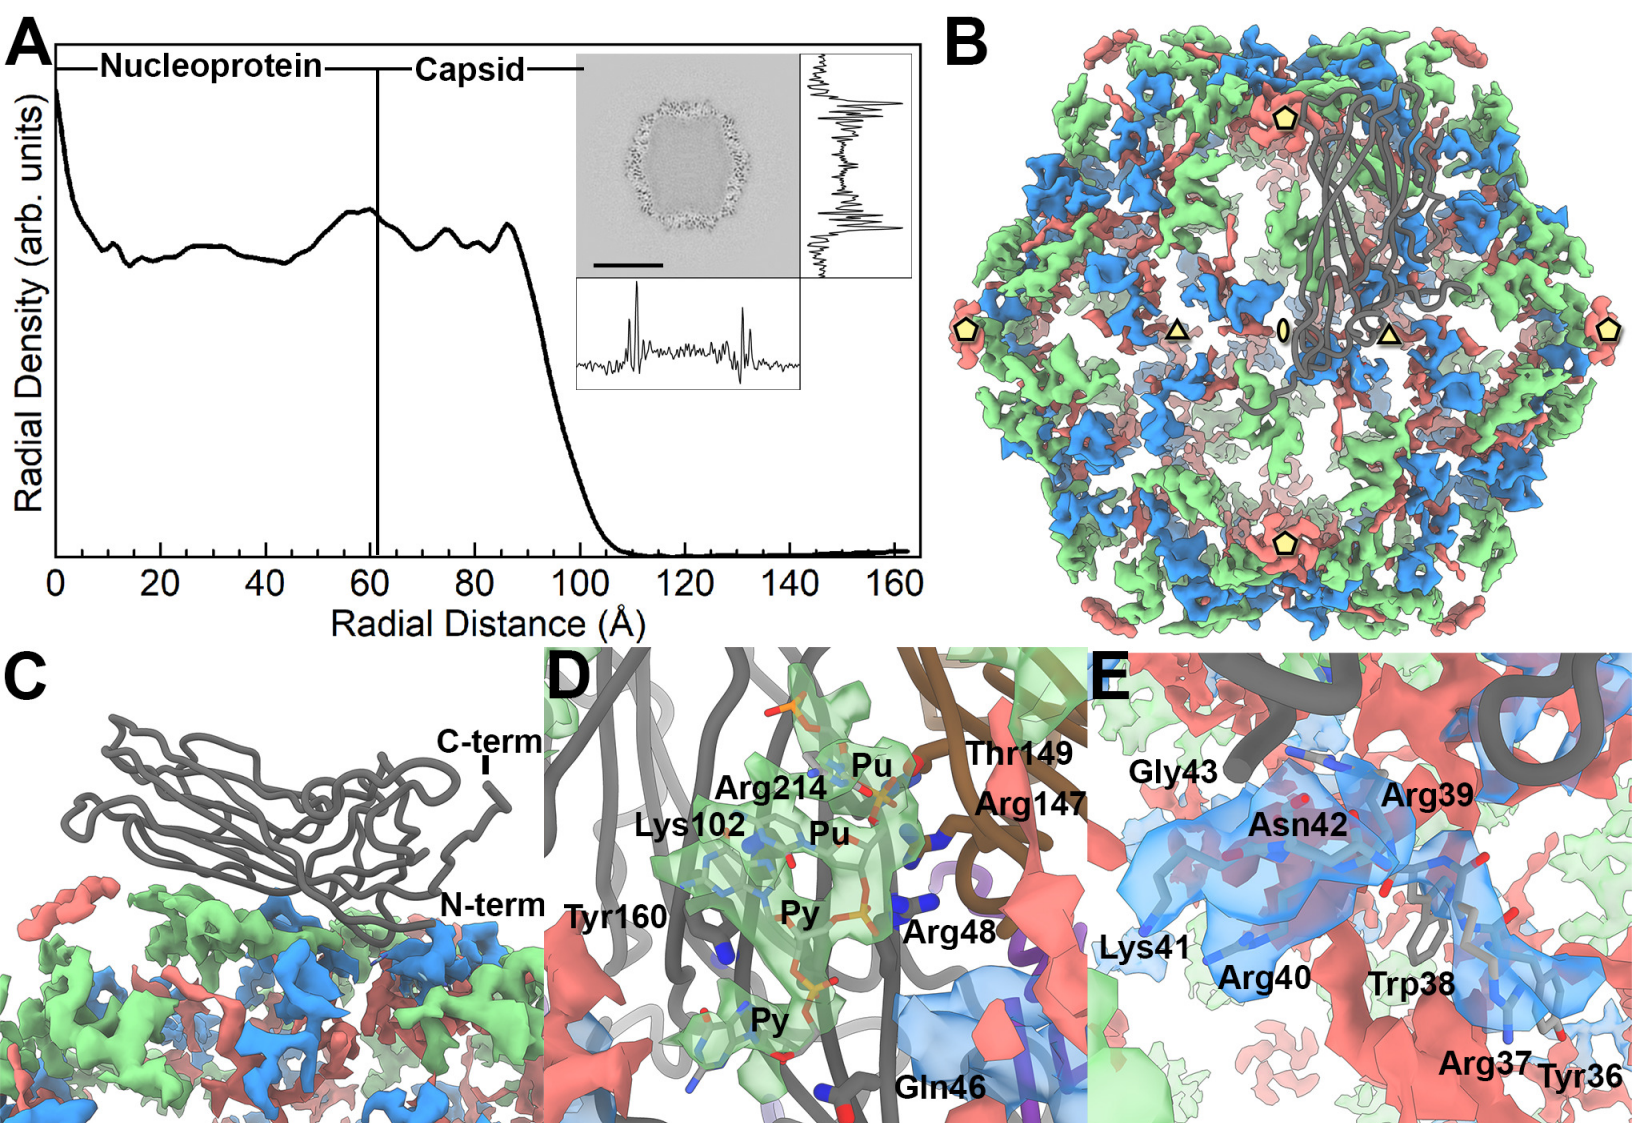

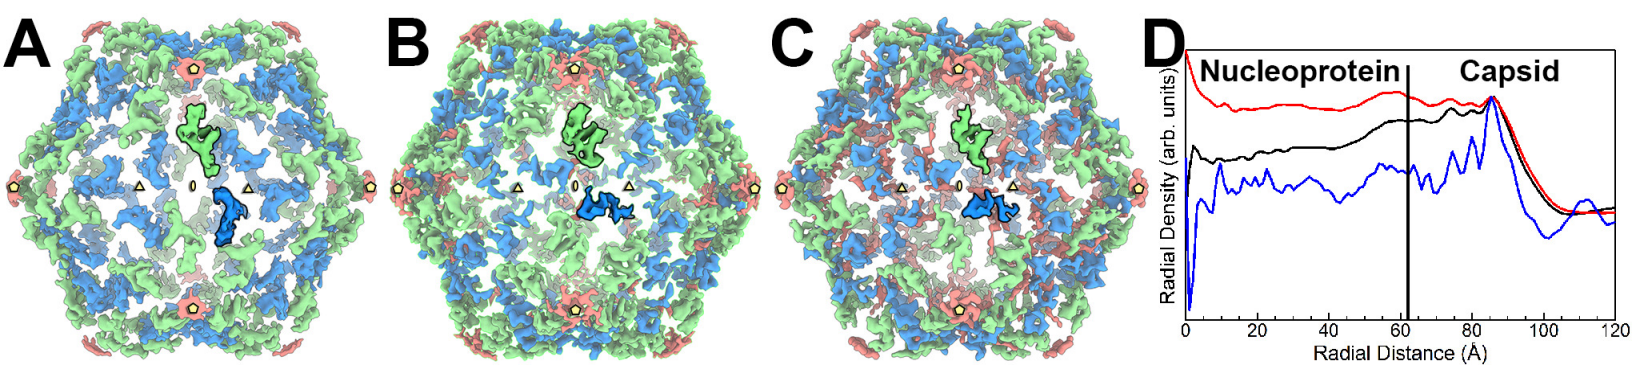



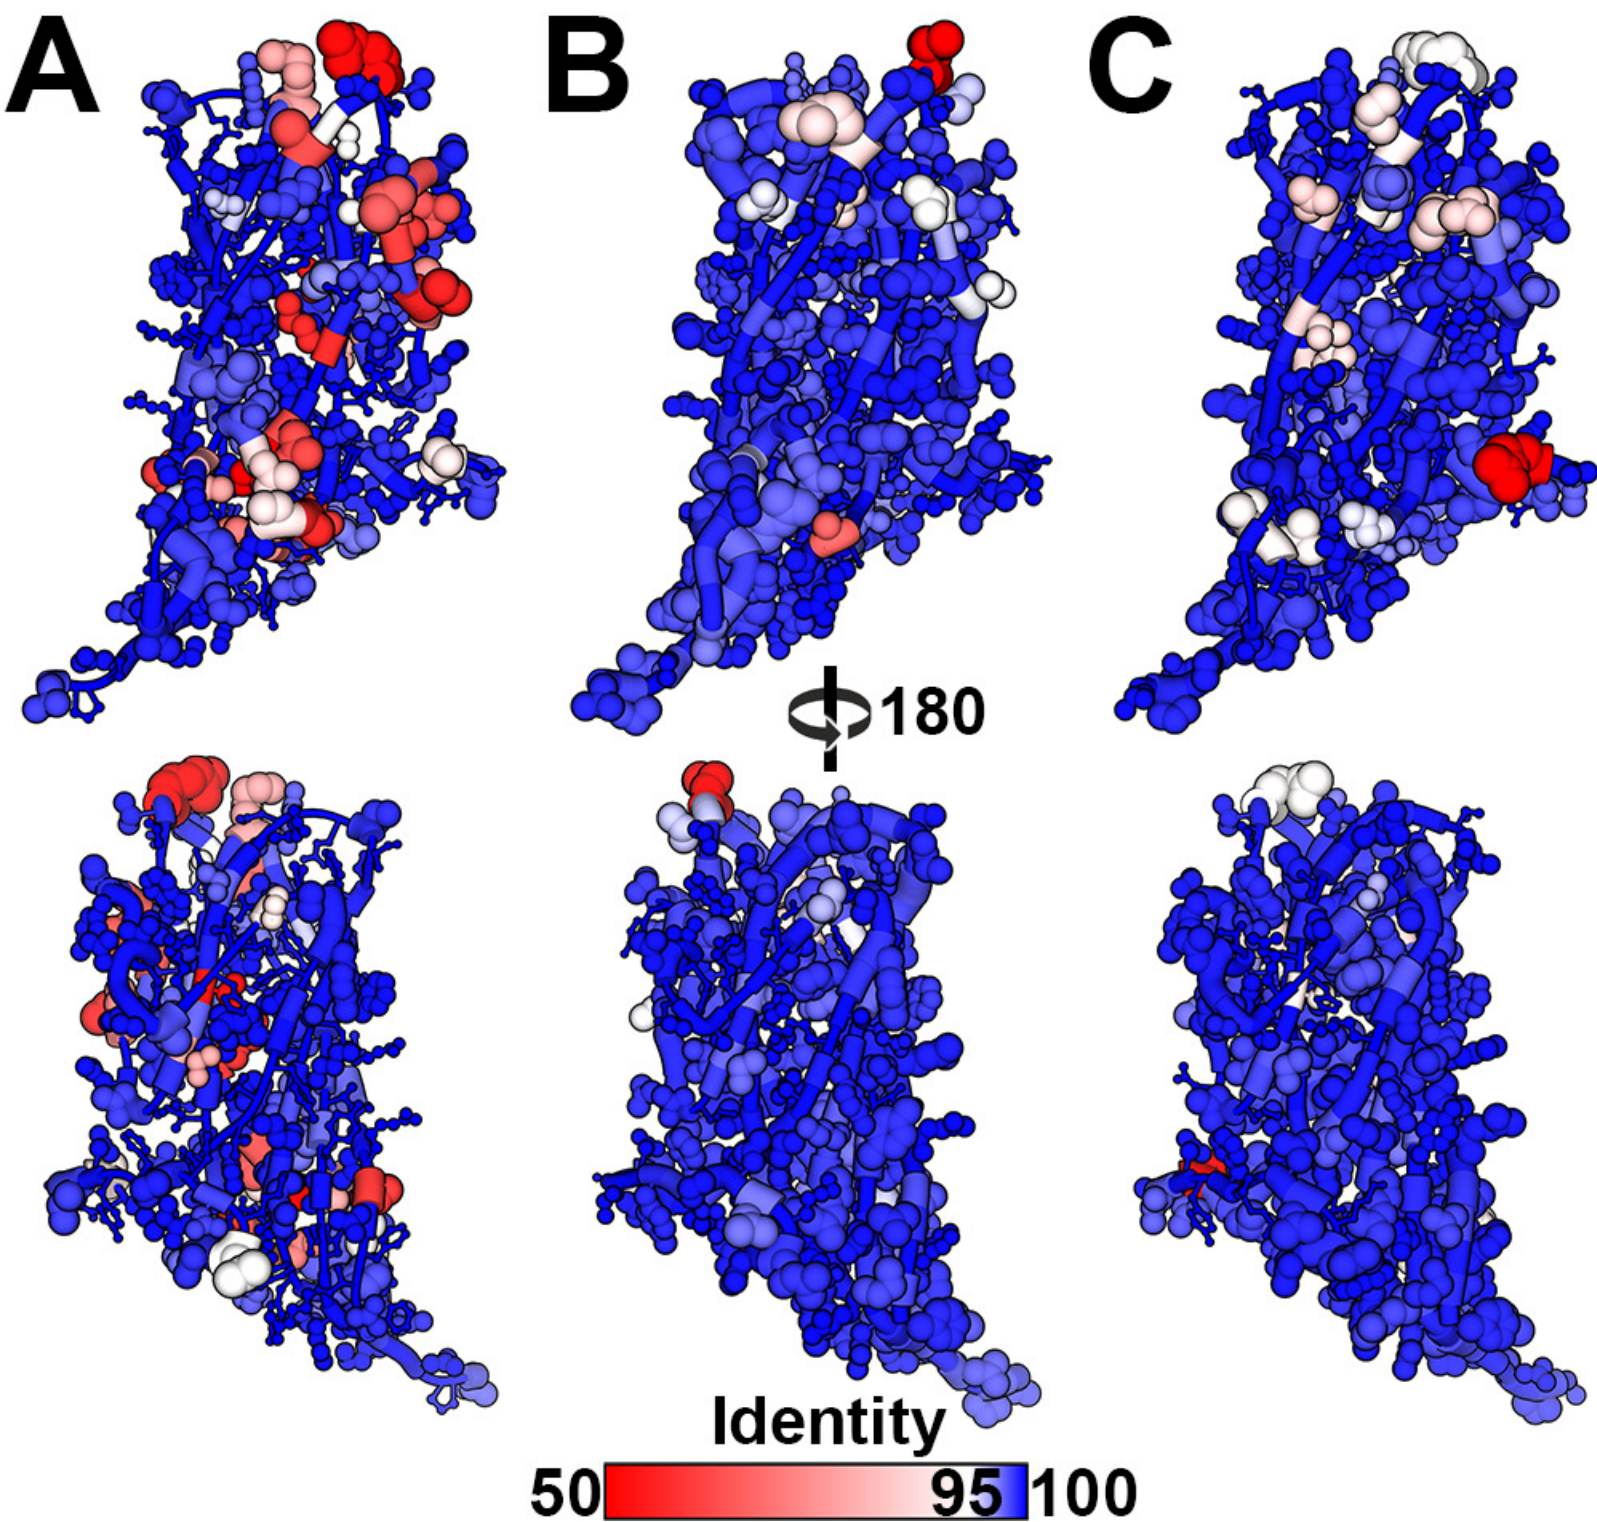

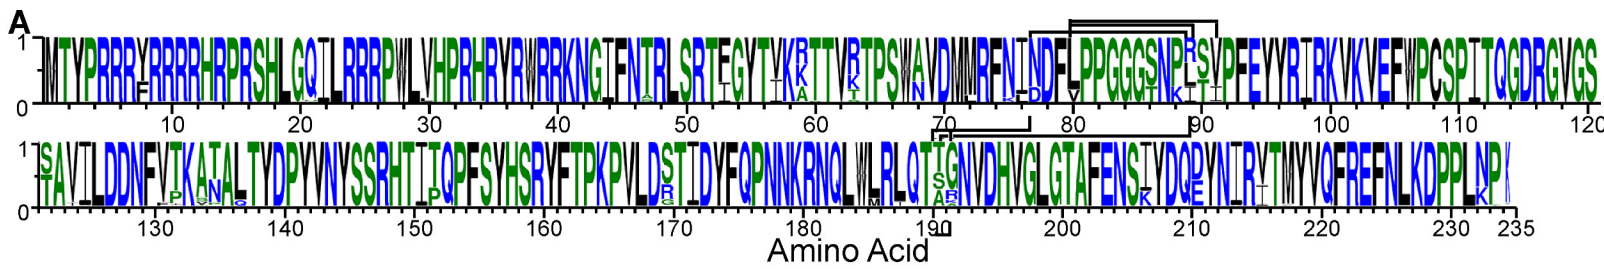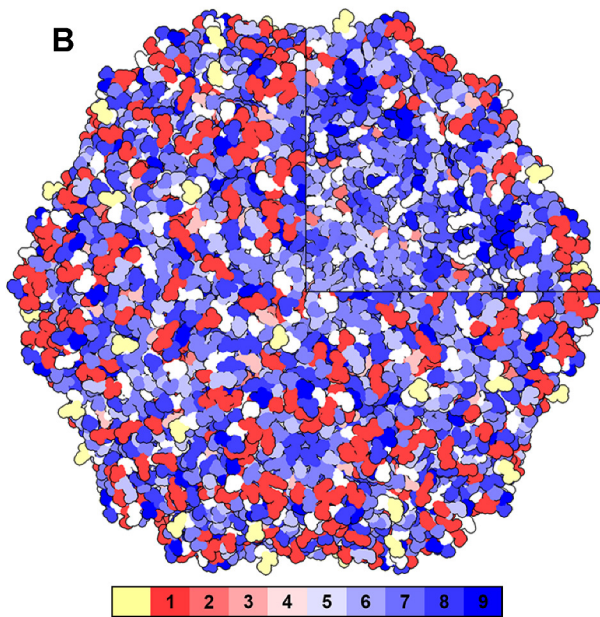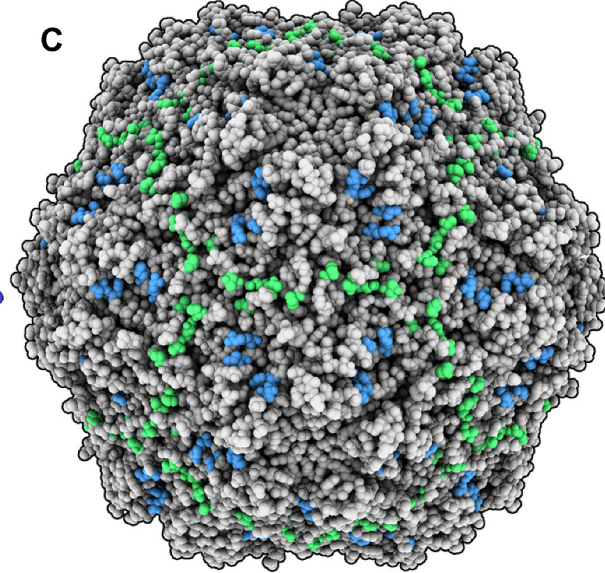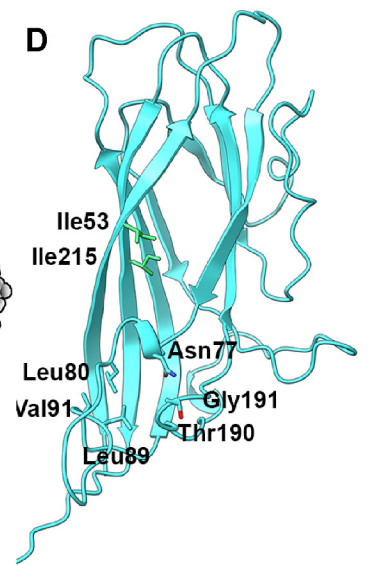



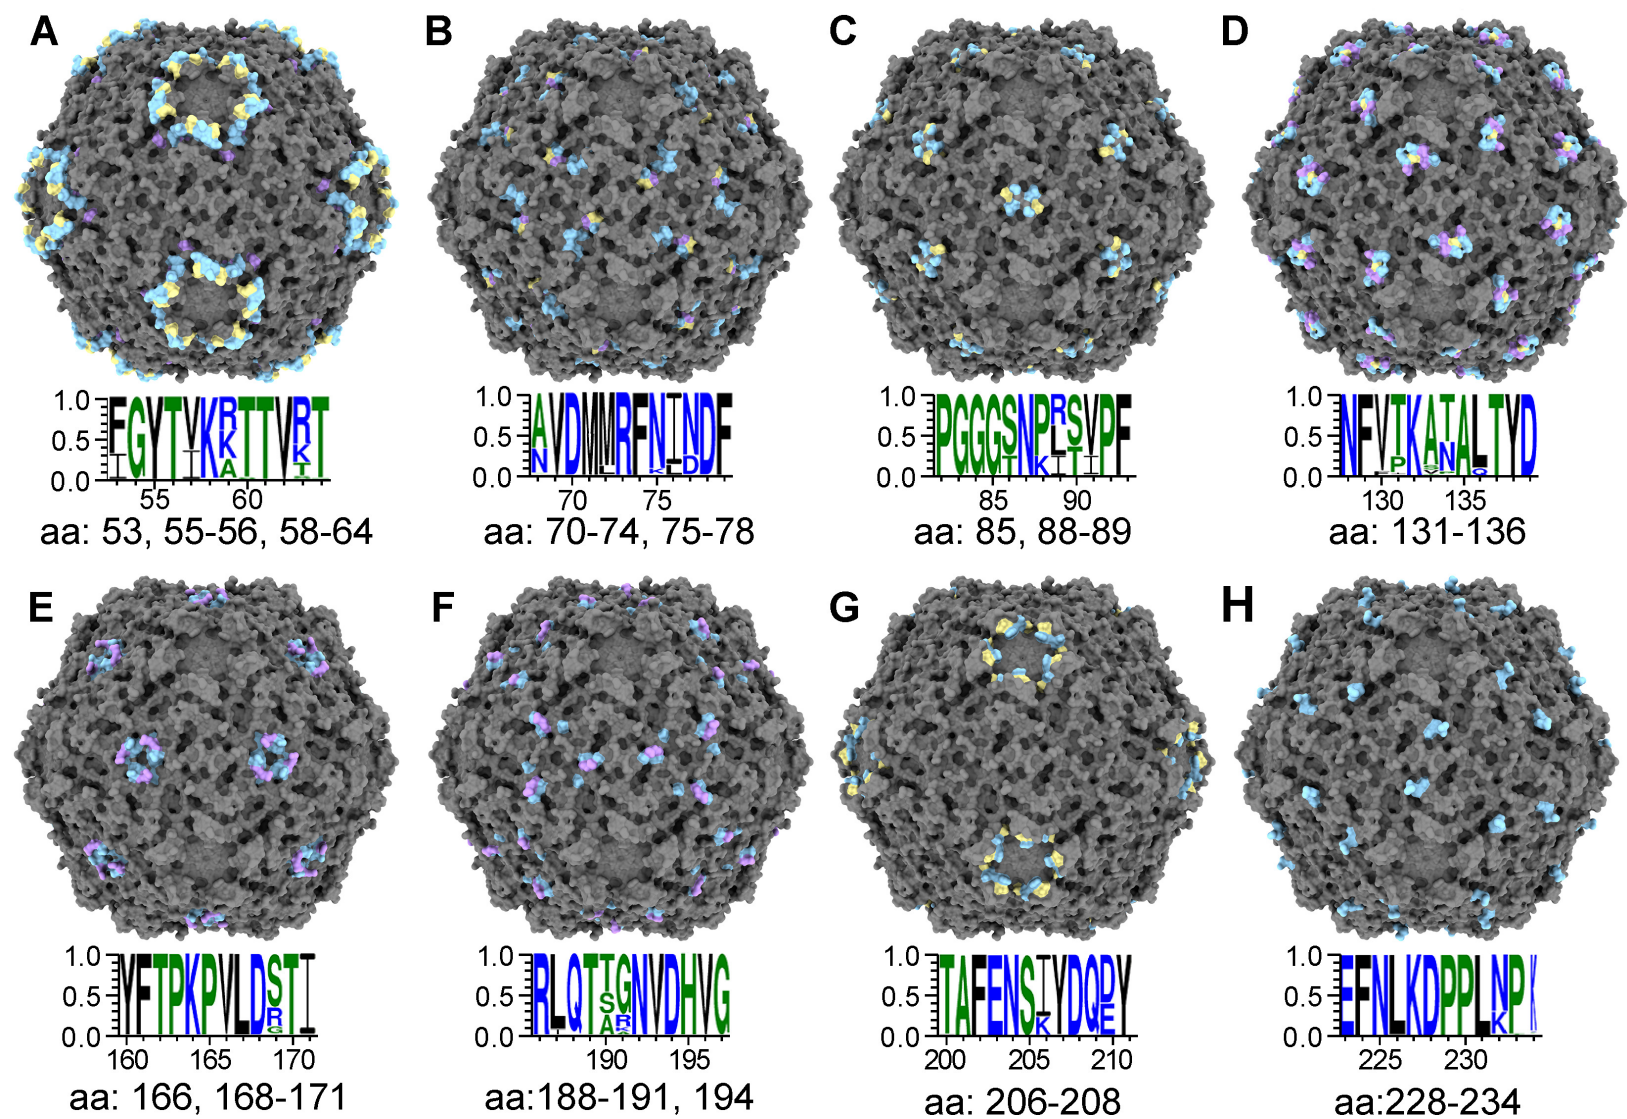

Source: http://biorxiv.org/content/10.1101/614198v1.full.pdf
